1 Climate-Sensitive Health Outcomes in Kenya: A Scoping  
2 Review of Environmental Exposures and Health Outcomes  
3 Research, 2000 – 2023

4 Jessica Gerard<sup>a</sup>, Titus Kibaara<sup>b</sup>, Iris Martine Blom<sup>c</sup>, Jane Falconer<sup>d</sup>, Shamsudeen  
5 Mohammed<sup>e</sup>, Zaharat Kadri-Alabi<sup>f</sup>, Roz Taylor<sup>g,h</sup>, Leila Abdullahi<sup>b</sup>, Robert C Hughes<sup>c</sup>, Bernard  
6 Onyango<sup>b</sup>, Ariel A Brunn<sup>a</sup>

7 <sup>a</sup> Department of Public Health, Environment, and Society, London School of Hygiene and Tropical Medicine; 15-  
8 17 Tavistock Place, London WC1H 9SH, United Kingdom, [jessica.gerard@lshtm.ac.uk](mailto:jessica.gerard@lshtm.ac.uk),  
9 [ariel.brunn@lshtm.ac.uk](mailto:ariel.brunn@lshtm.ac.uk).

10 <sup>b</sup> African Institute for Development Policy; / P.O. BOX 14688-00800, Westlands-Nairobi, Kenya/ P.O. BOX 31024,  
11 Lilongwe 3 Malawi [Titus.Kibaara@afidep.org](mailto:Titus.Kibaara@afidep.org), [levla.abdullahi@afidep.org](mailto:levla.abdullahi@afidep.org), [bernard.onyango@afidep.org](mailto:bernard.onyango@afidep.org).

12 <sup>c</sup> Centre on Climate Change and Planetary Health, London School of Hygiene & Tropical Medicine, London,  
13 United Kingdom, [iris.blom@lshtm.ac.uk](mailto:iris.blom@lshtm.ac.uk), [robert.hughes@lshtm.ac.uk](mailto:robert.hughes@lshtm.ac.uk).

14 <sup>d</sup> Library, Archive & Open Research Services, London School of Hygiene & Tropical Medicine, London WC1E 7HT.  
15 [jane.falconer@lshtm.ac.uk](mailto:jane.falconer@lshtm.ac.uk). <https://orcid.org/0000-0002-7329-0577>

16 <sup>e</sup> Department of Non-communicable Disease Epidemiology, Faculty of Epidemiology and Population Health,  
17 London School of Hygiene & Tropical Medicine, London, United Kingdom,  
18 [shamsudeen.mohammed1@lshtm.ac.uk](mailto:shamsudeen.mohammed1@lshtm.ac.uk).

19 <sup>f</sup> Policy and Practice Research Group, Pandemic Sciences Institute, University of Oxford, Oxford OX3 7DQ,  
20 United Kingdom, [zaharat.kadri-alabi@ndm.ox.ac.uk](mailto:zaharat.kadri-alabi@ndm.ox.ac.uk).

21 <sup>g</sup> Department of Disease Control, London School of Hygiene and Tropical Medicine; London WC1E 7HT, United  
22 Kingdom, [roz.taylor@lshtm.ac.uk](mailto:roz.taylor@lshtm.ac.uk).

23 <sup>h</sup> Medical Entomology and Zoonoses Ecology, UK Health Security Agency, Porton Down, United Kingdom

24 Corresponding author: [jessica.gerard@lshtm.ac.uk](mailto:jessica.gerard@lshtm.ac.uk)

25 Word count: [4080]

26

## 27 **Abstract**

28 Climate change threatens health and social development gains in Kenya, necessitating health policy  
29 planning for risk reduction and mitigation. To understand the baseline state of knowledge of  
30 environmental determinants of health in Kenya relevant to climate change, a comprehensive scoping  
31 review was undertaken. Compliant with a pre-registered protocol, nine bibliographic databases and  
32 grey literature sources were searched for articles published from 2000-2023. Two-stage screening  
33 was conducted on 17,394 articles; 635 full-texts were screened in duplicate. A final 353 articles  
34 underwent data extraction for topic categorisation, bibliometric analysis, and narrative summary.  
35 This was comprised of 344 (97%) journal articles, 59% of which were published after 2014 (n=207).  
36 Main study designs included observational (n=211) and modelling studies (n=64). Health topics  
37 centred on vector-borne diseases (41%, n=147), primarily vector abundance (n=102) and malaria  
38 (n=60), while injury or death (n=10), mental health conditions (n=7) and heat exposure (n=7) studies  
39 were less frequent. Environmental health research in Kenya is largely conducted in the Lake Victoria  
40 Basin, Rift Valley and Coastal regions, with fewer studies from the northern arid and semi-arid  
41 regions. Findings of this review suggest a growing and diverse field of predominantly observational  
42 research with an increasing focus on social determinants and policy-relevant themes, however  
43 research on vector-borne disease dwarfs other health outcomes and sparsely populated but  
44 climatically fragile regions are less represented in published literature. Addressing existing gaps in  
45 baseline evidence underpinning associations between the environment and health outcomes will  
46 benefit climate change attribution research and support future development of evidence-informed  
47 climate change and health policy in Kenya.

## 48 **Introduction**

49 The recent convergence of increasing extreme weather events and rising awareness of attributable  
50 anthropogenic contributions to climate change has sharpened global attention to the impact of  
51 environment on human health, wellbeing and livelihoods. This is particularly evident in sub-Saharan  
52 Africa (SSA) which experiences adverse effects of climate change, despite nominal contributions to  
53 global greenhouse gas emissions [1]. Kenya is highly susceptible to climate change due to its varied  
54 topography, diverse climatic zones, and reliance on natural resources and is the largest economy in  
55 East Africa with a growing population of 2.3% projected to nearly double by the turn of the century  
56 [2].

57 Currently, Kenya stands at an inflection point toward rapid industrialisation and sustainable growth,  
58 with the potential to provide a blueprint for climate-resilient economic development in the region.  
59 Kenya was the first country in Africa to enact legislation exclusively on climate change via the 2016  
60 Climate Change Act [3], which sets out pathways towards sustainable development through the  
61 National Climate Change Action Plan. This plan in turn advises on mechanisms of integrating sectoral  
62 climate change mitigation and adaptation actions at national and sub-national levels [4]. In 2023,  
63 Kenya convened the inaugural Africa Climate Summit in conjunction with the Africa Union  
64 Commission and launched the Nairobi declaration on green development [5] which linked health  
65 alongside economic development in support of the United Nations 2030 Sustainable Development  
66 Goals [6].

67 Various environmental exposures (EE) including weather, hydrometeorological hazards and air  
68 pollution pose risks to social development gains due to their influence on human health [7].  
69 However, many of these causal relationships have not been clearly defined in Kenya, potentially  
70 limiting opportunities for detection and attribution research over longer timeframes that would  
71 permit the evaluation of health impacts of climate change, with implications for the development of

72 evidence-informed climate change and health policy. To better understand the state of  
73 environmental health research, a comprehensive synthesis of published output on the influence of  
74 EE on health outcomes (HO) in Kenya was undertaken with the following objectives: (a) to undertake  
75 a scoping review of literature on relationships between EE and HO; (b) to map the links between  
76 these exposures and climate-sensitive HO and health equity through bibliometric analysis, topic  
77 mapping and narrative synthesis; and (c) to identify knowledge gaps and future research needs to  
78 strengthen the evidence base underpinning climate change and health (CCH) attribution for policy  
79 development. This article presents initial bibliometric analysis and narrative summary findings from  
80 the broader scoping review work on environmental health research in Kenya.

81

## 82 **Materials and Methods**

### 83 **Protocol and registration**

84 Reporting of this review was guided by the PRISMA extension for scoping reviews [8], as well as an  
85 established team of article reviewers, a library information professional, and subject matter experts  
86 in medicine, veterinary medicine, nutrition, demography, water, sanitation and health, and child  
87 health and development. A scoping review was deemed most suitable given the complexities and  
88 wide breadth of the subject matter and lack of similar reviews [9]. The protocol for this review was  
89 registered on Open Science Framework on April 14, 2023 [10].

### 90 **Eligibility criteria**

91 We aimed to identify a wide range of original literature describing the relationships between EE and  
92 HO, excluding intervention studies. The range of exposures included weather variables such as  
93 temperature and precipitation, hydrometeorological hazards including droughts and flooding, and  
94 climate variability phenomena such as El Niño – Southern Oscillation, with a full list found in Table  
95 S1. In recognition of the moderating effects of land-use change, terrestrial, aquatic and air pollution  
96 on health, these environmental drivers were also incorporated. Eligible health outcomes  
97 encompassed direct and indirectly impacted outcomes for example, heat stroke and vector-borne  
98 diseases (VBD), respectively.

99

100

101

102

103

| Topic Category                                      | Topic Subcategories                                                                                                                                                                                     |                                                                                                                                          |
|-----------------------------------------------------|---------------------------------------------------------------------------------------------------------------------------------------------------------------------------------------------------------|------------------------------------------------------------------------------------------------------------------------------------------|
| Injury or Death                                     | Direct injury<br>Direct death                                                                                                                                                                           | Burden estimate                                                                                                                          |
| Heat Exposure & Skin Conditions                     | Heat stress<br>Skin conditions                                                                                                                                                                          |                                                                                                                                          |
| Cardiovascular, Circulatory & Respiratory Disorders | Heart disease & circulatory disorders<br>Lung & airway conditions                                                                                                                                       | Respiratory infections                                                                                                                   |
| Waterborne Diseases & Water Access Disorders        | Cholera<br>Diarrheal diseases<br>Leptospirosis<br>Cryptosporidiosis<br>Schistosomiasis                                                                                                                  | Giardia<br>Dehydration & kidney disorders<br>Water insecurity<br>Harmful algal blooms                                                    |
| Vector-borne Diseases                               | Vector or parasite abundance or prevalence<br>Malaria<br>Dengue<br>Trypanosomiasis<br>Lymphatic filariasis<br>Leishmaniasis                                                                             | Tick-borne diseases<br>Soil-transmitted helminths<br>Yellow Fever<br>Chikungunya<br>West Nile Virus                                      |
| Zoonoses                                            | Animal reservoir abundance or zoonotic disease prevalence<br>Anthrax<br><i>Coxiella burnetii</i>                                                                                                        | Bartonellosis<br>Rift Valley fever<br>Brucellosis                                                                                        |
| Malnutrition & Foodborne Diseases                   | Stunting<br>Wasting<br>Malnutrition                                                                                                                                                                     | Food insecurity<br><i>Escherichia coli</i> & <i>Salmonella</i>                                                                           |
| Mental Health Conditions                            | Eco-anxiety & depression<br>Stress & resilience                                                                                                                                                         | Cognitive capacity                                                                                                                       |
| Adverse Birth or Pregnancy Outcomes                 | Neonatal or infant outcomes<br>Maternal health outcomes                                                                                                                                                 |                                                                                                                                          |
| Health Equity Research                              | Toxic level: air pollutants<br>Toxic level: water & terrestrial pollutants<br>Toxic level: other pollutants<br>Neoplasia<br>Pre-existing conditions<br>Displacement & migration<br>Occupational hazards | Health vulnerability<br>Awareness & Perceptions<br>Conflict<br>Gender-based violence<br>Access to health facilities<br>Health inequities |

104 **Table 1. Health outcome topic categories and their corresponding subcategories**

105 We included any original research published in English between January 1<sup>st</sup>, 2000, and February 20<sup>th</sup>,  
106 2023. This timeframe reflects the growing interest and discourse on health implications of climate  
107 change as well as improvements in environmental attribution methods in public health sciences [11].  
108 As our review focused on Kenya, we included studies on any demographic populations including  
109 transborder pastoralist communities, as well as global studies, if data from Kenya was disaggregated  
110 and extractable. Eligible studies were required to include some measure of a HO produced by either  
111 qualitative or quantitative analysis.

## 112 **Information source**

113 The search strategy was informed by the Population-Exposure-Comparator-Outcome (PECO) model:  
114 [12]

115 **P:** population of Kenya

116 **E:** environmental exposures, including weather, hydrometeorological hazards and air quality  
117 variables

118 **C:** no effect of environmental exposures on health conditions (as available, studies will not be  
119 excluded for lack of comparison groups)

120 **O:** disease burdens or measures of association or effect of environmental exposures on health  
121 outcomes

122 and included synonyms for health outcomes guided by categories listed in the World Health  
123 Organisation report, Quality Criteria for Health National Adaptation Planning [13]. The full methods,  
124 search terms and database search results were conducted by a Library information professional and  
125 are hosted in an open access digital repository maintained by the London School of Hygiene &  
126 Tropical Medicine [14]. Nine bibliographic databases were searched in February 2023: Medline,  
127 Embase, Global Health, Food Science and Technology Abstract and Econlit via OvidSP, GreenFile and  
128 Africa-Wide Information via EBSCOhost, Clarivate Analytics Web of Science core content and Scopus.

129 Grey literature sources included Google Scholar and websites of 10 organizations known to be  
130 working on environment or CCH research in Kenya.

## 131 **Selection process**

132 All citations were deduplicated and transferred into the reference manager software EPPI-Reviewer  
133 Web 4.14.2.0 [15] for two-stage screening. Title and abstract screening was conducted by a single  
134 trained reviewer against *a priori* inclusion criteria. All reviewers were trained on an initial sample of  
135 800 abstracts in duplicate to ensure consistency. Following primary screening, full-text articles were  
136 reviewed in duplicate for eligibility. At both stages of screening, reasons for exclusion were noted.

## 137 **Data extraction**

138 Data extraction was undertaken by two independent reviewers and confirmation of final extracted  
139 data arbitrated by a third reviewer. All articles were categorized by main HO (Table 1) and EE (Table  
140 S1). Main categories were further divided into subcategories that were refined using an iterative  
141 approach during data extraction. Data on publication year; author institutional affiliation; study type;  
142 article type; funder(s); location(s); and analysis method(s) were recorded. To investigate authorship  
143 and geographical extent of collaborations, the institutional affiliation(s) of authors were categorized  
144 into regional or international groups; funders were likewise allocated into one of six funding models.  
145 Analytical methods for each article were assessed by main study design and analysis methods  
146 employed. Covariate results were extracted and described in brief narrative summaries.

## 147 **Evidence synthesis**

148 We used bibliometric analysis and narrative summaries to synthesize the evidence. To explore  
149 characteristics of environment and health research in Kenya, we mapped locations of empirical  
150 research on HO to Kenya's main climatological zones [16], used keywords for conceptual mapping  
151 using VOSviewer software [17] and developed a Sankey diagram to illustrate environmental drivers of  
152 HO using R software [18, 19].



## 153 **Protocol amendments**

154 We applied two protocol amendments to our review. We expanded our eligibility criteria to include a  
155 category of research articles that measured pollutant toxicity since they provided data on an  
156 exposure risk, even if they did not measure impact on an explicit HO.

157 The second protocol amendment was made to the HO categories informed by the Quality Criteria for  
158 Health National Adaptation Plans [13]. We added the category “Adverse Pregnancy or Birth  
159 Conditions” to better reflect gender disparities in HO and expanded equity related subthemes under  
160 a category titled “Health Equity”.

## 161 **Results**

162 The bibliographic database search identified 29,443 records, of which 12,132 were duplicates  
163 removed prior to screening (Fig 1). The grey literature search identified 77 pieces of grey literature  
164 and 6 records from cited references, resulting in 17,394 unique references that underwent title and  
165 abstract screening. Of these, 635 underwent full text screening and 353 met inclusion criteria for the  
166 final article set (Table S2). A total of 26 full text reports, including 13 conference abstracts, could not  
167 be retrieved.

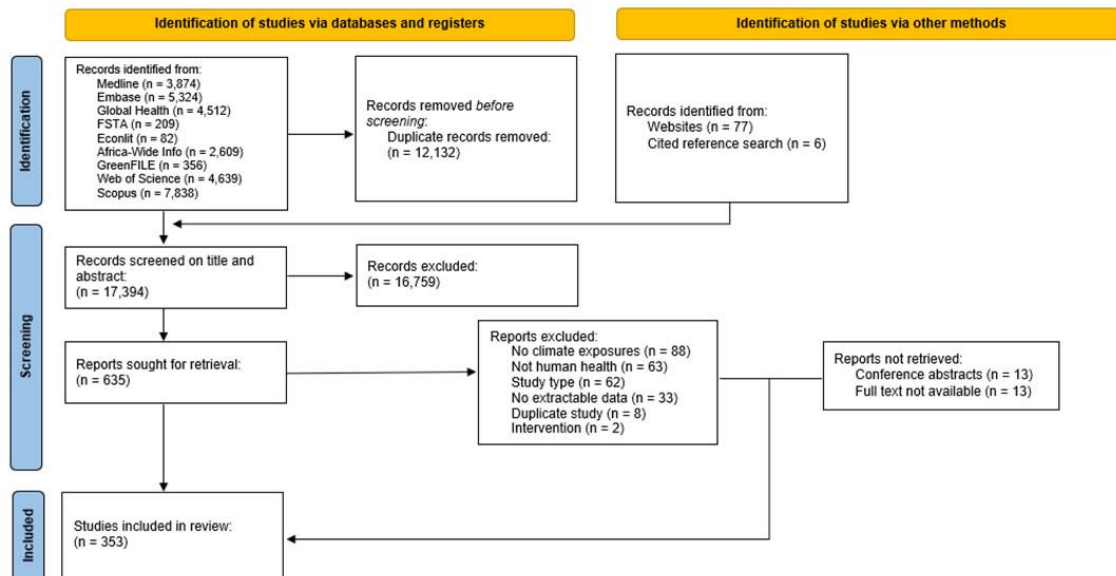

169

170 Fig 1. PRISMA flow diagram of evidence selection [20].

171

172 **Article characteristics**

173 The characteristics of the final set of articles are described in Table 2. The study set is primarily  
 174 comprised of journal articles (97%, n=344). Research on environmental determinants of health in  
 175 Kenya increased in frequency per 5-year period from 2000 to 2019 with a small decline between  
 176 2020–2023, likely due to the shorter search period of 3 years and 2 months. Analysis of author’s  
 177 institutional affiliations found that 52% (n=186) of articles were authored by international  
 178 collaborations, while fewer than 20% (n=67) were exclusively from Kenyan institutions. Likewise, the  
 179 majority of funding came from international public and private research funders, with just over 10%  
 180 (n=46) of funders cited as public (n=28), university (n=10), or private funders (n=8) from Kenya. 58  
 181 studies did not cite a funding source.

182 Most study designs (60%, n=211) were observational in nature while modelling, qualitative, and  
 183 randomized and non-randomized trials constituted 18% (n=64), 7.6% (n=27), and 6.7% (n=24),  
 184 respectively. Methods of analysis reflected the main study designs, where 21% (n = 144/689, Table 3)

185 used regression analysis, 8% (n=54/689) advanced modelling methods including mechanistic  
186 modelling, spatial modelling, machine learning and multicriteria decision making, 6.5% (n = 45/689)  
187 qualitative methods such as interviews and focus groups and 2.1% (n = 15/689) applied health risk  
188 exposure assessment calculations.

189

190

191

192

193

194

195

| Characteristic                               | Included literature (n) |
|----------------------------------------------|-------------------------|
| <b>Year Published</b>                        | 353                     |
| 2000 - 2004                                  | 25                      |
| 2005 - 2009                                  | 43                      |
| 2010 - 2014                                  | 78                      |
| 2015 - 2019                                  | 118                     |
| 2020 - 2023                                  | 89                      |
| <b>Institutional Collaborations</b>          | 353                     |
| Kenyan                                       | 67                      |
| African Region                               | 26                      |
| International                                | 186                     |
| International without African collaborations | 74                      |
| <b>Study Type</b>                            | 353                     |
| Observational                                | 211                     |
| Modelling Study                              | 64                      |
| Mixed methods                                | 24                      |
| Trials*                                      | 24                      |
| Qualitative                                  | 27                      |
| Meta-analysis                                | 3                       |
| <b>Geographic Scale</b>                      | 353                     |
| National                                     | 53                      |
| Regional                                     | 194                     |
| City/community                               | 91                      |
| Not specified/relevant                       | 13                      |

\*Includes both randomised and non-randomised trials

197 **Table 2. Single selectable bibliometric characteristics of included literature**

198 Table 2 summarises publication year, institutional collaboration, study type, and geographic scale.

199 Articles were allocated once within each category.

200

201

202

203

| Characteristic                                      | Included literature (n) |
|-----------------------------------------------------|-------------------------|
| <b>Health Outcome Categories</b>                    | <b>421</b>              |
| Vector-borne Diseases                               | 147                     |
| Health Equity Research                              | 129                     |
| Waterborne Diseases & Water Access Disorders        | 29                      |
| Cardiovascular, Circulatory & Respiratory Disorders | 28                      |
| Malnutrition & Foodborne Diseases                   | 24                      |
| Zoonoses                                            | 23                      |
| Adverse Birth or Pregnancy Outcomes                 | 16                      |
| Injury or Death                                     | 11                      |
| Mental Health Conditions                            | 7                       |
| Heat Exposure                                       | 7                       |
| <b>Methods of Analysis</b>                          | <b>689</b>              |
| Descriptive statistics                              | 236                     |
| Parametric and non-parametric statistical tests     | 156                     |
| Regression analysis                                 | 144                     |
| Advanced modelling methods                          | 54                      |
| Qualitative methods                                 | 45                      |
| Time-series analysis                                | 36                      |
| Health risk assessment                              | 15                      |
| Meta-analysis                                       | 3                       |
| <b>Funder(s)</b>                                    | <b>411</b>              |
| International funder(s)                             | 251                     |
| No funding cited                                    | 58                      |
| International university funding                    | 56                      |
| Kenya Government                                    | 28                      |
| University funding                                  | 10                      |
| Private/local funder                                | 8                       |

205 **Table 3. Multi-selectable bibliometric characteristics of included literature**

206 Table 3 summarises health outcome categories, methods of analysis and funder type. Articles could  
 207 be allocated more than once within each category.

208

209 **Keyword trends**

210 To identify trends in research interest, bibliometric keyword co-occurrence analysis was used to map  
211 the temporal relationship between terms in publication titles and abstracts [17]. A total of 11,070  
212 terms were identified and for optimization purposes, a threshold of inclusion of a minimum of 8  
213 occurrences was established and a relevance score of 60% was used, resulting in 142 keywords. The  
214 period of time over which the greatest shift in keyword trends occurred is shown in Fig 2.  
215 Connection lines indicate networks and circle sizes correspond to occurrence. Cluster density  
216 visualization highlights closeness between terms over time, illustrated as two clusters of keywords:  
217 cluster 1 (left, n = 68) VBD and climate exposures and cluster 2 (right, n = 74) social science and  
218 policy-oriented keywords.

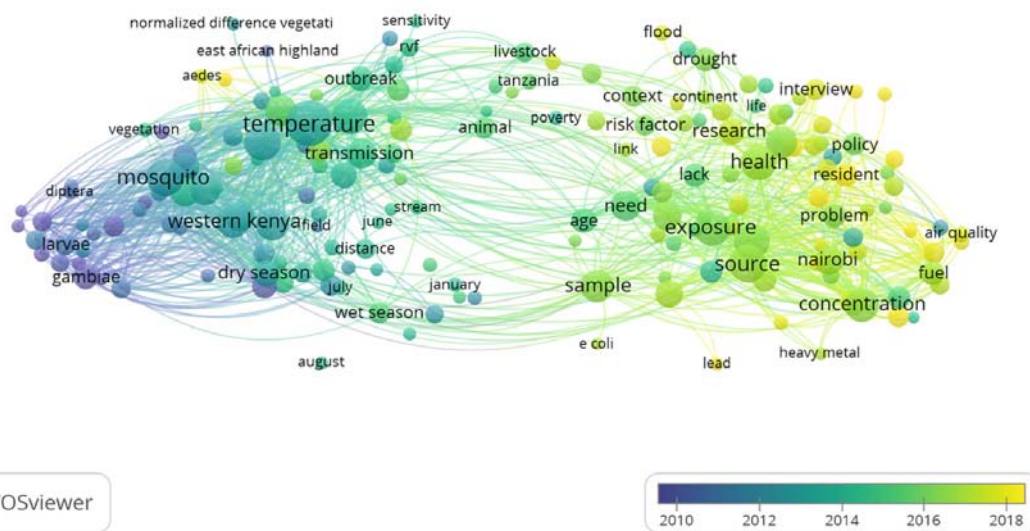

219

220 **Fig 2. Time-scaled bibliometric keyword analysis.**

221 A network map based on co-occurrence of keywords in titles & abstracts of included articles.

222

223 **Environmental drivers of health outcomes in Kenya**

224 Occurrences of environmental covariates of HO are shown in Fig 3, extracted from 353 articles.  
 225 Rainfall represented the most frequent exposure studied (n=218) and was specifically investigated as  
 226 a driver of VBD in 115 occurrences within the article set. Other exposures linked to VBD included  
 227 temperature (n=118), habitat change (n=61) and seasonality (n=60) – the latter of which was the  
 228 third-most studied exposure (n=142) after temperature (n=168). Climate change was a non-specific  
 229 exposure term used in studies that evaluated awareness of participants to climate change impacts on  
 230 health (n=10). Less studied EE by frequency included wildfires (n=1), plastic pollution (n=1) and water  
 231 level change (n=3).

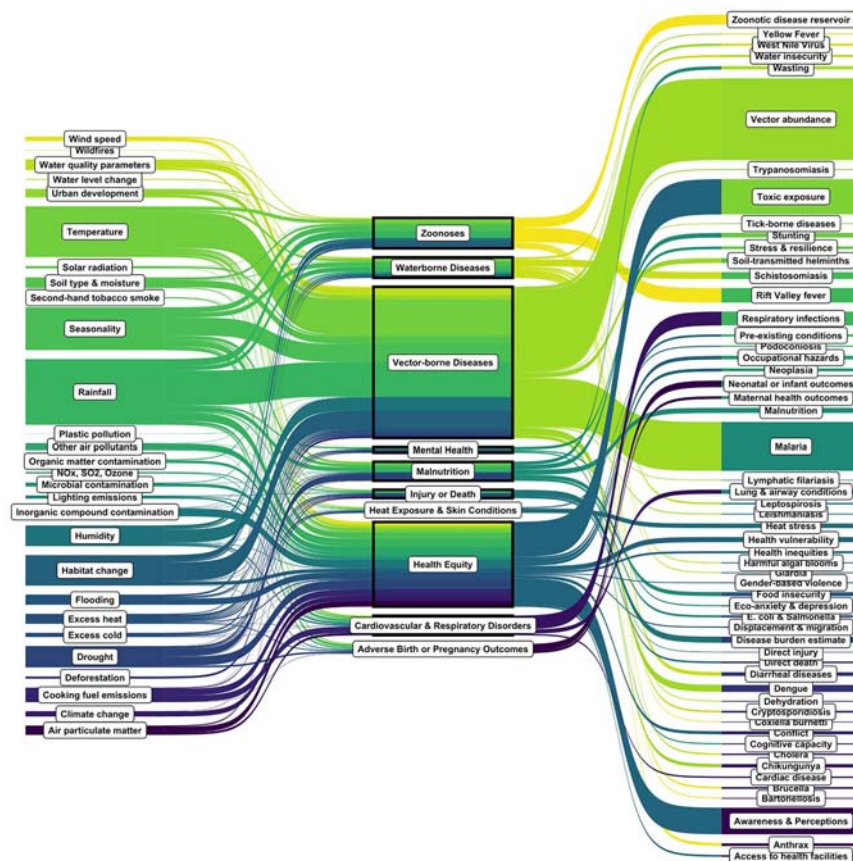

232

233 **Fig 3. Sankey diagram of pathways between environmental exposures and health outcomes**

234 Some category and subcategory names have been abbreviated for illustrative purposes, see table 1  
235 for full categorization.

236

237 The most frequently studied HO was VBD (n=502), followed by research relevant to health equity  
238 (n=281). The health equity category encompassed research describing toxic levels of air, terrestrial  
239 and water pollutants (n=117) (see Table 1 for full listing). Health outcomes including heat stress  
240 (n=15), maternal health outcomes (n=9), access to health facilities (n=6), eco-anxiety and depression  
241 (n=4) were infrequent in the article set. A full listing of all studies categorised by main HO is provided  
242 in Table S2.

243 **Research locations in Kenya**

244 Health outcome topic mapping from 287 articles with sub-location data (Fig 4) highlights the  
245 geographical distribution of empirical research based on climatological zones in Kenya [16]. The  
246 highest density of research occurs in Kenya's humid southwest region, including the Lake Victoria  
247 Basin, Rift Valley region and Nairobi, where 75% of VBD (153/205) and 80% of health equity research  
248 (105/132) was conducted. In contrast, HO studied in the northern arid and semi-arid lands (ASALs) of  
249 Kenya more frequently focused on malnutrition and zoonoses, of which less literature was identified  
250 overall (Table 3). Empirical research was least frequently conducted in the North Western Region,  
251 where it was also the least diverse of all regions, encompassing only half of all possible outcome  
252 categories.

253



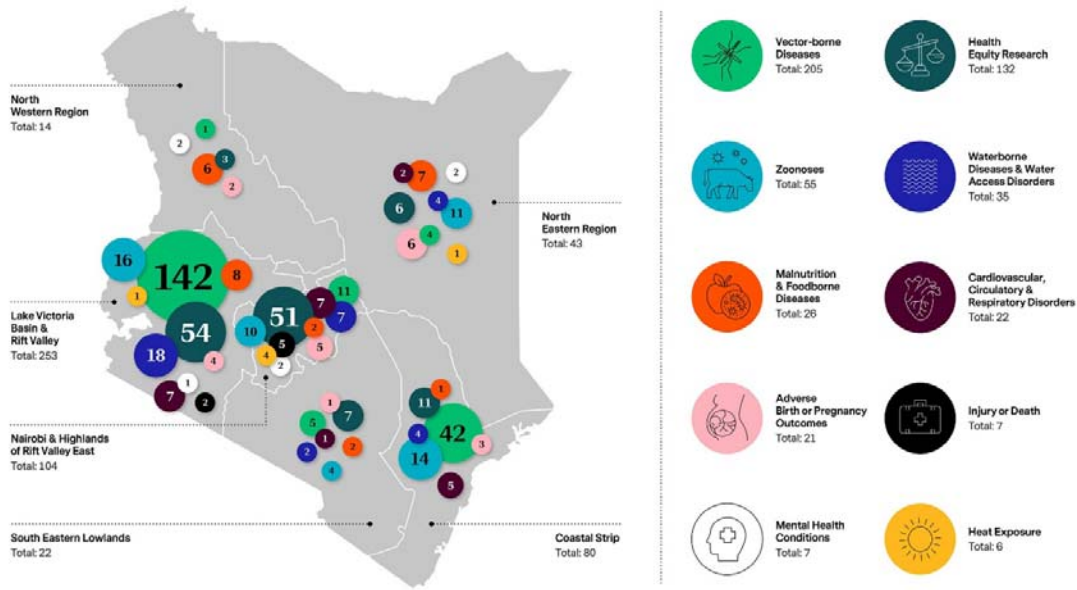

254

255 **Fig 4. Health outcomes studied in empirical environmental research conducted in Kenya by**  
 256 **climatological zone.**

257 This figure shows health outcome results extracted from studies that cited a location for data  
 258 collection (n=287).

259

260 **Health outcome summaries**

261 **Vector-borne diseases**

262 VBDs were the most studied HO in this review, evaluated in 147 studies, 69% of which focused on  
 263 vector abundance (n=102). These studies included assessments of malaria, dengue, yellow fever,  
 264 West Nile Virus and other VBD, and explored a variety of burden indicators, such as disease risk,  
 265 incidence, and vector population dynamics influenced by EE. Malaria was the most studied disease,  
 266 based on both clinical case reports (n=60) and vector abundance studies (n=66), with most research  
 267 conducted in southwestern Kenya (Table S2). There was comparatively less literature available on  
 268 non-malarial diseases such as dengue (n=7); soil-transmitted helminths (n=4); West Nile Virus (n=2)

269 and a single result each for trypanosomiasis, lymphatic filariasis, leishmaniasis, tick-borne diseases  
270 and yellow fever.

### 271 **Health equity research**

272 The largest subtopic of this category assessed respondent's awareness and perceptions of CCH  
273 (n=51), followed by exposure to air and water pollution, with 36 and 22 articles respectively.  
274 Demographic and social determinants were frequent elements to these studies, especially air  
275 pollutant exposure studies in informal settlements [21, 22] and studies on gender vulnerabilities of  
276 indoor air pollution [23-25]. Gendered access or lack thereof was identified in educational  
277 attainment and accessibility to health facilities [26, 27]. Two studies explored gender roles and  
278 violence in view of climate change, identifying a potential exacerbation of inequalities and harmful  
279 practices like female genital mutilation and intimate partner violence [27, 28]. Water-scarcity driven  
280 conflicts in pastoralist communities were also explored in three studies [29-31].

### 281 **Waterborne diseases & water access disorders**

282 Twenty-nine studies investigated waterborne disease and water access disorders in Kenya. Warming  
283 temperatures both increased and decreased Schistosomiasis transmission depending on the region,  
284 while precipitation had delayed influence on snail vector density [32-34]. Increased rainfall during  
285 the rainy season impacted cholera risk [35], and seasonality significantly influenced snail abundance  
286 and cryptosporidium prevalence [36-38]. Three studies on diarrheal disease risk assessed in the  
287 under-five population reported that dry season trends drive rotavirus infections [39-41].

### 288 **Cardiovascular, circulatory & respiratory disorders**

289 A number of studies on cardiovascular, circulatory and respiratory disorders assessed the relationship  
290 with household air pollutants (HAPs) (n=14), finding that exposure, especially over extended periods  
291 of time in women and children is linked to adverse outcomes [23, 42]. Exposure to HAPs such as  
292 particulate matter (PM<sub>2.5</sub>) and carbon monoxide (CO) have been linked to reduced cardiac function  
293 [43] and volatile organic compounds from wood smoke are associated with increased self-reported

294 respiratory, eye irritation and headache symptoms [44]. In households that used firewood or  
295 unprocessed biomass, children and infants under the age of five had a greater relative risk of  
296 developing acute respiratory infections (ARI) compared to those using kerosene fuels; long-term  
297 exposure to PM<sub>2.5</sub> also increased these conditions and symptoms [42, 45, 46].

### 298 **Malnutrition & foodborne diseases**

299 Approximately 5% of studies included in this review evaluated the impact of climate variables on  
300 nutritional deficiencies (n=24), frequently measured in relation to drought or changes in  
301 precipitation or through proxy measures such as Normalized Difference Vegetation Index. In northern  
302 Kenyan counties, temperature is positively associated with malnutrition [47] and the impact of  
303 drought is inversely correlated with validated growth measures such as middle-upper-arm-  
304 circumference, height-for-age and weight-for-age Z-scores in children [48, 49].

### 305 **Zoonoses**

306 Two studies assessed how EE impact wildlife host density and immunocompetence of rodents in  
307 relation to zoonotic disease [50], as well as interactions between precipitation and land-use change  
308 on infected rodent host density [51]. Climate risk factors for Rift Valley Fever (RVF), a zoonotic virus  
309 that causes disease in livestock and haemorrhagic fever in humans, was evaluated in fifteen studies  
310 through empirical and modelling methods applied to livestock, humans and mosquito vectors.  
311 Rainfall abnormalities, vegetation change and measures of humidity were shown to determine the  
312 abundance and suitability of potential habitats for RVF vectors [52-54], and also impact vector and  
313 host susceptibility [55].

### 314 **Adverse birth or pregnancy outcomes**

315 Environmental exposures that impact the health of mothers and infants were investigated in 16  
316 studies. Seven articles evaluated precipitation, seasonality and drought and the associated effect on  
317 anthropometric measurements of nutritional status [49, 56]. Disease prevalence in children under  
318 five years of age, assessed in six studies, was characterized by seasonal patterns of occurrence;

319 investigated diseases included rotavirus, *Escherichia coli*, shigellosis, cryptosporidiosis and other  
320 enteropathogens [37, 39-41]. Two additional studies looked at infant ARI, including human  
321 metapneumovirus [57] and Respiratory Syncytial Virus incidence [58].

### 322 **Injury or death**

323 Ten studies were categorized as evaluating death or injury due to trauma linked to environmental  
324 exposures as well as studies that measured disease burden, using standard mortality and morbidity  
325 metrics. The relationship between temperature and premature mortality was assessed using years of  
326 life lost [59, 60] and through burden estimates of morbidity [61-63] and disability-adjusted life-years  
327 (DALYs) [64]. DALYs were also used in four studies to estimate the overall burden of HAPs on health  
328 [64-67].

### 329 **Mental health conditions**

330 Mental health conditions were infrequently studied (n = 7) in the article set. These studies evaluated  
331 the impacts of extreme weather events and climate shocks on economic status, mental wellbeing,  
332 and psychological distress [68-71].

### 333 **Heat exposure & skin conditions**

334 Four studies investigated the impacts of temperature extremes on mortality measures and found  
335 significant positive associations between exposure to low temperature and mortality in Nairobi  
336 populations [59, 60, 72, 73]. An additional two studies reported on vulnerability indices [74],  
337 hydration in agro pastoralists [75] and a single study described Podoconiosis distribution and risk  
338 prediction in relation to different scenarios of environmental suitability [76].

## 339 **Discussion**

340 Our review compiled literature on EE and health impacts in Kenya, and in doing so, identified broad  
341 trends and emerging gaps in evidence. With meteorological projections indicating warmer  
342 temperatures, changing rainfall patterns and increasing flood and drought events [77, 78], the

343 findings of this review are relevant to researchers and policymakers aiming to establish the risks to  
344 population health attributable to Kenya's changing climate.

## 345 **Research trends**

346 We found a diverse range of research on environmentally mediated HO. Nonetheless, the highest  
347 proportion of literature focused on VBD, particularly studies that evaluated clinical malaria as well as  
348 malaria vector abundance. There is an identified inequality in global funding trends for research on  
349 the 23 WHO-defined neglected tropical diseases (NTDs), as emphasized by funding from United  
350 States of \$100 million on these diseases versus \$1.5 billion for human immunodeficiency virus,  
351 malaria and tuberculosis combined in 2016 alone [79-81]. While this funding has substantially  
352 advanced understanding and supported successful control measures of these high burden diseases,  
353 many environmentally mediated NTDs in Kenya remain understudied [82]. In addition, a  
354 comparatively low amount of literature used a One Health approach to evaluate interconnected  
355 relationships between human, animal and environmental health pathways. This may be due to a lack  
356 of data, difficulties in establishing ecological dependencies, and challenges in the use of integrative  
357 and multisectoral approaches to support sustainable control efforts [83].

358 Most literature in this review was published by collaborations of international authors and supported  
359 by international funders, raising questions about inequities in global health research and funding  
360 structures in Kenya particularly given the prominence of Kenyan actors in CCH research in Africa [84].  
361 More equitable funding and support for Kenyan-produced research outputs could drive contextually  
362 relevant research agendas and better amplify local voices [84, 85].

## 363 **Shifting narratives**

364 Our evaluation of key themes in environment and health research in Kenya suggests a broadening of  
365 interest over the last decade towards social science, health equity and policy research from more  
366 conventional environmental health topics such as VBD. This shift reflects a larger pattern of change

367 towards improvements in attribution methods alongside cross-disciplinary approaches, including  
368 those in social sciences, occurring in public health research [86-88]. Subjects relevant to health  
369 equity were identified in several articles focused on vulnerable populations including pollution  
370 exposure studies of residents of informal settlements, water scarcity conflicts in pastoralist  
371 communities, and extreme weather effects on intimate partner violence, cognitive development and  
372 education access for young girls. Some studies measured associations between EE and HO, such as  
373 air pollution exposure on cardiovascular or respiratory outcomes, but a proportion measured toxic  
374 exposure risks only. A shift was also seen towards studies which explored contextual experience of  
375 CCH pathways, assessed through qualitative techniques. Perceptions of how climate change impacts  
376 health provide insights to the need for improved public health promotion in Kenya and underscore  
377 calls for targeted capacity building as well as climate change training for healthcare workers and the  
378 wider public health sector [89].

## 379 **Research gaps**

380 Mental health conditions were less frequently studied in our article set. A recent scoping review  
381 found that despite rapid growth, the global output of climate change and mental health research is  
382 comparatively lower than other health conditions and limited in scope [90]. Similarly, heat exposure  
383 was understudied, despite climate model projections that indicate parts of Kenya, alongside other  
384 SSA countries, will experience the greatest increase in frequency of heat stress days globally [74].  
385 Recent research from West Africa has confirmed a link between heat impacts and adverse birth  
386 outcomes related to fetal strain [91], however most research on this topic is based on data from  
387 high-income countries, possibly due to scarcity of temperature ground monitoring and health data  
388 [92]. Given the high fertility rate in Kenya and relatively high rate of neonatal mortality [93, 94], the  
389 low volume of gender-oriented articles points to an important research gap. Accordingly, we found  
390 need to amend health outcome categories that were based on a WHO framework on climate-

391 sensitive health risks to specifically include adverse birth and pregnancy outcomes [95], given  
392 recognized inequities in climate impacts on women’s health [96].

393 There was a gap in research on malnutrition and foodborne disease, a principal risk factor of deaths  
394 and disabilities in Kenya, despite evidence that climate change has contributed to the ongoing Horn  
395 of Africa drought causing 20,000 excess child deaths in 2022 [97-99]. In infants and children,  
396 malnutrition can have long-lasting health impacts which is relevant to Kenya’s young population [48].

397 In the northern ASALs of Kenya where pastoralist communities reside, there is a need for greater  
398 exploration of the impacts of worsening drought patterns on these groups [100]. These EE can cause  
399 secondary effects in communities in the form of tribal conflict over water and livestock resources or  
400 gendered violence [27, 31]. Ongoing conflict and insecurity in northern areas may exacerbate  
401 geographic disparities seen in research output, resulting in a much higher density of publications in  
402 the southwestern region, home to nearly 90% of the population in an area less than 20% of Kenyan  
403 land mass [2, 101]

## 404 **Limitations**

405 As environmental health research is a rapidly growing area of study, our search terminology  
406 attempted to encompass a wide variety of exposures and outcomes in line with WHO defined  
407 pathways. We aimed to minimize missing articles by using broad terminology in our search and  
408 screening criteria, incorporating a grey literature search, and using recognized frameworks for health  
409 categorization. In addition, this scoping review did not set out to conduct a risk of bias assessment  
410 and thus cannot draw conclusions on quality of evidence; however future reviews would benefit  
411 from assessment to provide confidence in results.

## 412 **Conclusions**

413 This review provides a baseline analysis of the scale and scope of evidence describing environmental  
414 impacts on health in Kenya. Its diversity illustrates the wide range of health pathways that have been

415 studied in Kenya and identifies trends in institutional collaborations, funding patterns, and research  
416 priorities. Greater attention is needed on vulnerable groups, geographical disparities in research and  
417 complex relationships between environmental determinants and less frequently studied HO to  
418 ensure equity of the growing research. Targeted capacity building, funding reform and enhanced  
419 support for local and regional institutional networks are necessary steps to build the evidence base  
420 and safeguard population health in the face of Kenya's changing climate.

421

## 422 **CRedit authorship contribution statement**

423 **Jessica Gerard:** Formal Analysis, Investigation, Visualization, Data Curation, Writing – original draft,  
424 Writing – Review & Editing. **Titus Kibaara:** Investigation, Data Curation, Writing – original draft,  
425 Writing – Review & Editing. **Iris Blom:** Conceptualization, Methodology, Investigation, Data Curation,  
426 Writing – Review and Editing. **Jane Falconer:** Methodology, Investigation, Data Curation, Writing –  
427 Review & Editing. **Shamsudeen Mohammed:** Methodology, Investigation, Data Curation, Writing –  
428 Review & Editing. **Zaharat Kadri-Alabi:** Investigation, Data Curation, Writing – Review & Editing. **Roz**  
429 **Taylor:** Investigation, Data Curation, Writing – Review & Editing. **Leila Abdullahi:** Conceptualization,  
430 Methodology, Writing – Review & Editing. **Robert C Hughes:** Conceptualization, Investigation,  
431 Writing – Reviewing & Editing. **Bernard Onyango:** Conceptualization, Investigation, Writing –  
432 Reviewing & Editing. **Ariel Brunn:** Conceptualization, Formal Analysis, Investigation, Visualization,  
433 Writing – original draft, Writing – Review & Editing, Supervision.

## 434 **Declaration of competing interest**

435 IMB declares having received three partial grants for her studies. A Prince Bernhard Culture Fund  
436 grant number 40037327 was awarded on 15 September 2021; Stichting VSBFonds grant number  
437 VSB.21/00168 was awarded on 17 May 2021; dr. Hendrik Mullerfonds without grant number was  
438 awarded on 9 December 2021. RCH reports receiving grant funding for research on climate change



439 and health from the Wellcome Trust, The Bernard van Leer Foundation, and Fondation Botnar, and  
440 has worked as an employee or consultant for the Children's Investment Fund Foundation, The Clean  
441 Air Fund and The Abu Dhabi Early Childhood Development Authority. Additional authors declare they  
442 have no actual or potential competing interests that could influence the work herein reported.

## 443 **Acknowledgements**

444 This work was supported by the Childrens' Investment Fund Foundation [grant number 2008-05023].  
445 The funders had no role in study design, data collection and analysis, decision to publish, or  
446 preparation of this manuscript. The opinions expressed here belong to the authors, and do not  
447 necessarily reflect those of the funder.

448

## References

- 450 1. World Meteorological Organization. State of the Climate in Africa 2021. 2022. Available from:  
451 <https://library.wmo.int/records/item/58070-state-of-the-climate-in-africa-2021>.
- 452 2. World Bank Group. Climate Risk Profile: Kenya. 2021. Available from:  
453 [https://climateknowledgeportal.worldbank.org/sites/default/files/2021-05/15724-](https://climateknowledgeportal.worldbank.org/sites/default/files/2021-05/15724-WB_Kenya%20Country%20Profile-WEB.pdf)  
454 [WB\\_Kenya%20Country%20Profile-WEB.pdf](https://climateknowledgeportal.worldbank.org/sites/default/files/2021-05/15724-WB_Kenya%20Country%20Profile-WEB.pdf).
- 455 3. Wambua C. The Kenya Climate Change Act 2016 Emerging Lessons From a Pioneer Law.  
456 *Carbon & Climate Law Review*. 2019;13(4):257-69, doi:10.21552/cclr/2019/4/6.
- 457 4. Government of the Republic of Kenya. National Climate Change Action Plan (Kenya): 2018-  
458 2022. In: Ministry of Environment and Forestry, editor. Nairobi2018. Available from:  
459 [https://rise.esmap.org/data/files/library/kenya/Clean%20Cooking/Kenya\\_NCCAP\\_2018-2022.pdf](https://rise.esmap.org/data/files/library/kenya/Clean%20Cooking/Kenya_NCCAP_2018-2022.pdf).
- 460 5. Oguta E. Kenya Hosts First African Climate Summit. *Diplomacy Newsletter* [Internet]. 2023;  
461 (25). Available from: [https://mfa.go.ke/wp-content/uploads/2023/10/DIPLOMACY-ENEWSLETTER-](https://mfa.go.ke/wp-content/uploads/2023/10/DIPLOMACY-ENEWSLETTER-AUG-SEP-EDITION.pdf)  
462 [AUG-SEP-EDITION.pdf](https://mfa.go.ke/wp-content/uploads/2023/10/DIPLOMACY-ENEWSLETTER-AUG-SEP-EDITION.pdf).
- 463 6. United Nations. Transforming our World: The 2030 Agenda for Sustainable Development.  
464 2015. Available from: <https://sdgs.un.org/2030agenda>.
- 465 7. Mora C, McKenzie T, Gaw IM, Dean JM, Von Hammerstein H, Knudson TA, et al. Over half of  
466 known human pathogenic diseases can be aggravated by climate change. *Nature Climate Change*.  
467 2022;12(9):869-75, doi:10.1038/s41558-022-01426-1.
- 468 8. Sarkis-Onofre R, Catalá-López F, Aromataris E, Lockwood C. How to properly use the PRISMA  
469 Statement. *Systematic Reviews*. 2021;10(1):117, doi:10.1186/s13643-021-01671-z.
- 470 9. Pham MT, Rajić A, Greig JD, Sargeant JM, Papadopoulos A, McEwen SA. A scoping review of  
471 scoping reviews: advancing the approach and enhancing the consistency. *Research Synthesis*  
472 *Methods*. 2014;5(4):371-85, doi:10.1002/jrsm.1123.
- 473 10. Brunn A, Ray S, Blom I, Gerard J, Hughes R.C., Kibaara T., Onyango B, Abdullahi L, Falconer J.  
474 Climate-Sensitive Health Outcomes in Kenya: A Protocol for a Scoping Review of the Impact of  
475 Environmental Exposures on Health Outcomes. 2023, doi: 10.17605/OSF.IO/FP6SD.
- 476 11. Callaghan MW, Minx JC, Forster PM. A topography of climate change research. *Nature*  
477 *Climate Change*. 2020;10(2):118-23, doi:10.1038/s41558-019-0684-5.
- 478 12. Morgan RL, Whaley P, Thayer KA, Schünemann HJ. Identifying the PECO: A framework for  
479 formulating good questions to explore the association of environmental and other exposures with  
480 health outcomes. *Environ Int*. 2018;121(Pt 1):1027-31, doi:10.1016/j.envint.2018.07.015.
- 481 13. World Health Organization. Quality criteria for health national adaptation plans.  
482 Geneva2021. Available from: <https://www.who.int/publications/i/item/9789240018983>.
- 483 14. Falconer J, Brunn A. Search strategies for "A Scoping Review of the Influence of  
484 Environmental Exposures on Health Outcomes in Kenya". London, United Kingdom: London School of  
485 Hygiene & Tropical Medicine. 2023, doi:10.17037/DATA.00003705.
- 486 15. Thomas J, Brunton, J., Graziosi, S. EPPI-Reviewer 4.0: software for research synthesis. EPPI  
487 Centre Software. London: Social Science Research Unit, Institute of Education, University of London;  
488 2010.
- 489 16. Kenya Meteorological Department. State of the Climate in Kenya 2020. [Internet]. 2020.  
490 Available from: [www.meteo.go.ke](http://www.meteo.go.ke).
- 491 17. van Eck NJW, L. VOSViewer: Visualizing Scientific Landscapes: Version 1.6.19. 2023.
- 492 18. R Core Team. R: A language and environment for statistical computing. R Foundation for  
493 Statistical Computing. Vienna, Austria2023.
- 494 19. Popay J, Roberts H, Sowden A, Petticrew M, Arai L, Rodgers M, Britten N, Roen K, Duffy S.  
495 Guidance on the conduct of narrative synthesis in systematic reviews. ESRC Methods Programme

496 Version 12006. p. 1-92. Available from: <https://www.lancaster.ac.uk/media/lancaster->  
497 [university/content-assets/documents/fhm/dhr/chir/NSsynthesisguidanceVersion1-April2006.pdf](https://www.lancaster.ac.uk/media/lancaster-university/content-assets/documents/fhm/dhr/chir/NSsynthesisguidanceVersion1-April2006.pdf).  
498 20. Page MJ, McKenzie JE, Bossuyt PM, Boutron I, Hoffmann TC, Mulrow CD, et al. The PRISMA  
499 2020 statement: an updated guideline for reporting systematic reviews. *BMJ*. 2021;372:n71,  
500 doi:10.1136/bmj.n71.

501 21. Egondi T, Muindi K, Kyobutungi C, Gatari M, Rocklöv J. Measuring exposure levels of inhalable  
502 airborne particles (PM<sub>2.5</sub>) in two socially deprived areas of Nairobi, Kenya. *Environ Res*.  
503 2016;148:500-6, doi:10.1016/j.envres.2016.03.018.

504 22. Kiai C, Kanali C, Sang J, Gatari M. Spatial Extent and Distribution of Ambient Airborne  
505 Particulate Matter (PM<sub>2.5</sub>) in Selected Land Use Sites in Nairobi, Kenya. *J Environ Public Health*.  
506 2021;2021:4258816, doi:10.1155/2021/4258816.

507 23. Dohoo C, Guernsey JR, Critchley K, VanLeeuwen J. Pilot study on the impact of biogas as a  
508 fuel source on respiratory health of women on rural Kenyan smallholder dairy farms. *J Environ Public*  
509 *Health*. 2012;2012:636298, doi:10.1155/2012/636298.

510 24. Ezzati M, Saleh H, Kammen DM. The contributions of emissions and spatial  
511 microenvironments to exposure to indoor air pollution from biomass combustion in Kenya. *Environ*  
512 *Health Perspect*. 2000;108(9):833-9, doi:10.1289/ehp.00108833.

513 25. Ochieng C, Vardoulakis S, Tonne C. Household air pollution following replacement of  
514 traditional open fire with an improved rocket type cookstove. *Sci Total Environ*. 2017;580:440-7,  
515 doi:10.1016/j.scitotenv.2016.10.233.

516 26. Zuurmond M, Nyapera V, Mwenda V, Kisia J, Rono H, Palmer J. Childhood disability in  
517 Turkana, Kenya: Understanding how carers cope in a complex humanitarian setting. *Afr J Disabil*.  
518 2016;5(1):277, doi:10.4102/ajod.v5i1.277.

519 27. Esho T, Komba, E., Richard, F., Shell-Duncan, B. Intersections between climate change and  
520 female genital mutilation among the Maasai of Kajiado County, Kenya. *Journal of Global Health*.  
521 2021(1), doi:10.7189/jogh.11.04033.

522 28. Allen EM, Munala L, Henderson JR. Kenyan Women Bearing the Cost of Climate Change. *Int J*  
523 *Environ Res Public Health*. 2021;18(23), doi:10.3390/ijerph182312697.

524 29. Linke AM, O'Loughlin J, McCabe JT, Tir J, Witmer FDW. Rainfall variability and violence in rural  
525 Kenya: Investigating the effects of drought and the role of local institutions with survey data. *Global*  
526 *Environmental Change*. 2015;34:35-47, doi:10.1016/j.gloenvcha.2015.04.007.

527 30. Linke AM, Witmer FDW, O'Loughlin J. Weather variability and conflict forecasts: Dynamic  
528 human-environment interactions in Kenya. *Political Geography*. 2022;92:102489,  
529 doi:10.1016/j.polgeo.2021.102489.

530 31. Omosa E. The Impact of Water Conflicts on Pastoral Livelihoods: The Case of Wajir District in  
531 Kenya.: International Institute for Sustainable Development; 2005. Available from:  
532 [https://www.iisd.org/publications/report/impact-water-conflicts-pastoral-livelihoods-case-wajir-](https://www.iisd.org/publications/report/impact-water-conflicts-pastoral-livelihoods-case-wajir-district-kenya)  
533 [district-kenya](https://www.iisd.org/publications/report/impact-water-conflicts-pastoral-livelihoods-case-wajir-district-kenya).

534 32. McNally KL. Developing risk assessment maps for *Schistosoma haematobium* in Kenya based  
535 on climate grids and remotely sensed data: Louisiana State University; 2003. Available from:  
536 [https://repository.lsu.edu/gradschool\\_theses/1851](https://repository.lsu.edu/gradschool_theses/1851).

537 33. McCreesh N, Nikulin G, Booth M. Predicting the effects of climate change on *Schistosoma*  
538 *mansoni* transmission in eastern Africa. *Parasites & Vectors*. 2015;8(1):4, doi:10.1186/s13071-014-  
539 0617-0.

540 34. Kariuki HC, Clennon JA, Brady MS, Kitron U, Sturrock RF, Ouma JH, et al. Distribution patterns  
541 and cercarial shedding of *Bulinus nasutus* and other snails in the Msambweni area, Coast Province,  
542 Kenya. *Am J Trop Med Hyg*. 2004;70(4):449-56, doi: 10.4269/ajtmh.2004.70.449.

543 35. Stoltzfus JD, Carter JY, Akpınar-Elci M, Matu M, Kimotho V, Giganti MJ, et al. Interaction  
544 between climatic, environmental, and demographic factors on cholera outbreaks in Kenya. *Infect Dis*  
545 *Poverty*. 2014;3(1):37, doi:10.1186/2049-9957-3-37.

546 36. Muchiri JM, Ascolillo L, Mugambi M, Mutwiri T, Ward HD, Naumova EN, et al. Seasonality of  
547 *Cryptosporidium* oocyst detection in surface waters of Meru, Kenya as determined by two isolation  
548 methods followed by PCR. *J Water Health*. 2009;7(1):67-75, doi:10.2166/wh.2009.109.

549 37. Gatei W, Wamae CN, Mbae C, Waruru A, Mulinge E, Waithera T, et al. Cryptosporidiosis:  
550 prevalence, genotype analysis, and symptoms associated with infections in children in Kenya. *Am J*  
551 *Trop Med Hyg*. 2006;75(1):78-82, doi: 10.4269/ajtmh.2006.75.78.

552 38. Mutuku FM, King CH, Bustinduy AL, Mungai PL, Muchiri EM, Kitron U. Impact of drought on  
553 the spatial pattern of transmission of *Schistosoma haematobium* in coastal Kenya. *Am J Trop Med*  
554 *Hyg*. 2011;85(6):1065-70, doi:10.4269/ajtmh.2011.11-0186.

555 39. Omere R, Tate JE, O'Reilly CE, Ayers T, Williamson J, Moke F, et al. Epidemiology, Seasonality  
556 and Factors Associated with Rotavirus Infection among Children with Moderate-to-Severe Diarrhea in  
557 Rural Western Kenya, 2008-2012: The Global Enteric Multicenter Study (GEMS). *PLoS One*.  
558 2016;11(8):e0160060, doi:10.1371/journal.pone.0160060.

559 40. Lambisia AW, Onchaga S, Murunga N, Lewa CS, Nyanjom SG, Agoti CN. Epidemiological  
560 Trends of Five Common Diarrhea-Associated Enteric Viruses Pre- and Post-Rotavirus Vaccine  
561 Introduction in Coastal Kenya. *Pathogens*. 2020;9(8), doi:10.3390/pathogens9080660.

562 41. Gikonyo J, Mbatia B, Okanya P, Obiero G, Sang C, Nyangao J. Rotavirus prevalence and  
563 seasonal distribution post vaccine introduction in Nairobi county Kenya. *Pan Afr Med J*. 2019;33:269,  
564 doi:10.11604/pamj.2019.33.269.18203.

565 42. Sikolia DN, Mwololo, K., Cherop, H., Hussein, A., Juma, M., Kurui, J., Bwika, A., Seki, I., Osaki,  
566 Y. The prevalence of acute respiratory infections and the associated risk factors: a study of children  
567 under five years of age in Kibera Lindi Village, Nairobi, Kenya. *Journal of National Institute of Public*  
568 *Health*. 2002;51(1):67-72. Available from: [https://www.niph.go.jp/journal/data/51-](https://www.niph.go.jp/journal/data/51-1/200251010012.pdf)  
569 [1/200251010012.pdf](https://www.niph.go.jp/journal/data/51-1/200251010012.pdf).

570 43. Agarwal A, Kirwa K, Eliot MN, Alenezi F, Menya D, Mitter SS, et al. Household Air Pollution Is  
571 Associated with Altered Cardiac Function among Women in Kenya. *Am J Respir Crit Care Med*.  
572 2018;197(7):958-61, doi:10.1164/rccm.201704-0832LE.

573 44. Critchley K. Air quality, respiratory health and wood use for women converting from low- to  
574 high-efficiency stoves in rural Kenya. 2015, doi:10.2495/air150171.

575 45. Foote EM, Gieraltowski L, Ayers T, Sadumah I, Faith SH, Silk BJ, et al. Impact of locally-  
576 produced, ceramic cookstoves on respiratory disease in children in rural western Kenya. *Am J Trop*  
577 *Med Hyg*. 2013;88(1):132-7, doi:10.4269/ajtmh.2012.12-0496.

578 46. Larson PS, Espira L, Glenn BE, Larson MC, Crowe CS, Jang S, O'Neill MS. Long-Term PM(2.5)  
579 Exposure Is Associated with Symptoms of Acute Respiratory Infections among Children under Five  
580 Years of Age in Kenya, 2014. *Int J Environ Res Public Health*. 2022;19(5), doi:10.3390/ijerph19052525.

581 47. Kipkulei H, Boitt M, Imwatis A. Spatial Variability of Malnutrition and Predictions Based on  
582 Climate Change and Other Causal Factors: A Case Study of North Rift ASAL Counties of Kenya. *Journal*  
583 *of Earth Science & Climatic Change*. 2017;8(10):416, doi:10.4172/2157-7617.1000416.

584 48. Bauer JM, Mburu S. Effects of drought on child health in Marsabit District, Northern Kenya.  
585 *Econ Hum Biol*. 2017;24:74-9, doi:10.1016/j.ehb.2016.10.010.

586 49. Ongudi ST, D R. Prenatal health and weather-related shocks under social safety net policy in  
587 Kenya. *Economic Research Southern Africa (ERSA)*. 2020;831. Available from:  
588 [https://econrsa.org/wp-content/uploads/2022/06/working\\_paper\\_831.pdf](https://econrsa.org/wp-content/uploads/2022/06/working_paper_831.pdf).

589 50. Young HS, McCauley DJ, Dirzo R, Nunn CL, Campana MG, Agwanda B, et al. Interacting effects  
590 of land use and climate on rodent-borne pathogens in central Kenya. *Philosophical Transactions of*  
591 *the Royal Society B: Biological Sciences*. 2017;372(1722):20160116, doi:10.1098/rstb.2016.0116.

592 51. Young HS, Dirzo R, Helgen KM, McCauley DJ, Billeter SA, Kosoy MY, et al. Declines in large  
593 wildlife increase landscape-level prevalence of rodent-borne disease in Africa. *Proc Natl Acad Sci U S*  
594 *A*. 2014;111(19):7036-41, doi:10.1073/pnas.1404958111.

595 52. Anyamba A, Chretien JP, Small J, Tucker CJ, Formenty PB, Richardson JH, et al. Prediction of a  
596 Rift Valley fever outbreak. *Proc Natl Acad Sci U S A*. 2009;106(3):955-9,  
597 doi:10.1073/pnas.0806490106.

598 53. Campbell LP, Reuman DC, Lutomiah J, Peterson AT, Linthicum KJ, Britch SC, et al. Predicting  
599 Abundances of *Aedes mcintoshi*, a primary Rift Valley fever virus mosquito vector. *PLOS ONE*.  
600 2019;14(12):e0226617, doi:10.1371/journal.pone.0226617.

601 54. Mosomtai G, Evander M, Sandström P, Ahlm C, Sang R, Hassan OA, et al. Association of  
602 ecological factors with Rift Valley fever occurrence and mapping of risk zones in Kenya. *Int J Infect*  
603 *Dis*. 2016;46:49-55, doi:10.1016/j.ijid.2016.03.013.

604 55. McIntyre KM, Setzkorn C, Hepworth PJ, Morand S, Morse AP, Baylis M. Systematic  
605 Assessment of the Climate Sensitivity of Important Human and Domestic Animals Pathogens in  
606 Europe. *Scientific Reports*. 2017;7(1):7134, doi:10.1038/s41598-017-06948-9.

607 56. Bakhtsiyarava M, Grace K, Nawrotzki RJ. Climate, Birth Weight, and Agricultural Livelihoods in  
608 Kenya and Mali. *Am J Public Health*. 2018;108(S2):S144-s50, doi:10.2105/ajph.2017.304128.

609 57. Owor BE, Masankwa GN, Mwangi LC, Njeru RW, Agoti CN, Nokes DJ. Human  
610 metapneumovirus epidemiological and evolutionary patterns in Coastal Kenya, 2007-11. *BMC Infect*  
611 *Dis*. 2016;16:301, doi:10.1186/s12879-016-1605-0.

612 58. Wambua J, Munywoki PK, Coletti P, Nyawanda BO, Murunga N, Nokes DJ, Hens N. Drivers of  
613 respiratory syncytial virus seasonal epidemics in children under 5 years in Kilifi, coastal Kenya. *PLoS*  
614 *One*. 2022;17(11):e0278066, doi:10.1371/journal.pone.0278066.

615 59. Sewe MO, Bunker A, Ingole V, Egondi T, Astrom DO, Hondula DM, et al. Estimated Effect of  
616 Temperature on Years of Life Lost: A Retrospective Time-Series Study of Low-, Middle-, and High-  
617 Income Regions. *Environmental Health Perspectives*. 2018;126:17004, doi:10.1289/EHP1745.

618 60. Egondi T, Kyobutungi C, Rocklöv J. Temperature variation and heat wave and cold spell  
619 impacts on years of life lost among the urban poor population of Nairobi, Kenya. *Int J Environ Res*  
620 *Public Health*. 2015;12(3):2735-48, doi:10.3390/ijerph120302735.

621 61. Bherwani H, Kumar S, Musugu K, Nair M, Gautam S, Gupta A, et al. Assessment and valuation  
622 of health impacts of fine particulate matter during COVID-19 lockdown: a comprehensive study of  
623 tropical and sub tropical countries. *Environ Sci Pollut Res Int*. 2021;28(32):44522-37,  
624 doi:10.1007/s11356-021-13813-w.

625 62. Mukeka JM, Ogutu JO, Kanga E, Piepho H-P, Røskaft E. Long-term trends in elephant mortality  
626 and their causes in Kenya. *Frontiers in Conservation Science*. 2022;3,  
627 doi:10.3389/fcosc.2022.975682.

628 63. Egondi T, Ettarh R, Kyobutungi C, Ng N, Rocklöv J. Exposure to Outdoor Particles (PM<sub>2.5</sub>) and  
629 Associated Child Morbidity and Mortality in Socially Deprived Neighborhoods of Nairobi, Kenya.  
630 *Atmosphere*. 2018;9(9):351, doi:10.3390/atmos9090351.

631 64. Lee KK, Bing R, Kiang J, Bashir S, Spath N, Stelzle D, et al. Adverse health effects associated  
632 with household air pollution: a systematic review, meta-analysis, and burden estimation study.  
633 *Lancet Glob Health*. 2020;8(11):e1427-e34, doi:10.1016/s2214-109x(20)30343-0.

634 65. Dianati K, Zimmermann N, Milner J, Muindi K, Ezech A, Chege M, et al. Household air pollution  
635 in Nairobi's slums: A long-term policy evaluation using participatory system dynamics. *Sci Total*  
636 *Environ*. 2019;660:1108-34, doi:10.1016/j.scitotenv.2018.12.430.

637 66. Dianati K, Schäfer L, Milner J, Gómez-Sanabria A, Gitau H, Hale J, Langmaack H, Kiesewetter  
638 G, Muindi K, Mberu B, Zimmermann N, Michie S, Wilkinson P, Davies M. A system dynamics-based  
639 scenario analysis of residential solid waste management in Kisumu, Kenya. *Science of the Total*  
640 *Environment*. 2021(777):146-200, doi:10.1016/j.scitotenv.2021.146200.

641 67. Owili PO, Muga MA, Pan WC, Kuo HW. Cooking fuel and risk of under-five mortality in 23  
642 Sub-Saharan African countries: a population-based study. *Int J Environ Health Res*. 2017;27(3):191-  
643 204, doi:10.1080/09603123.2017.1332347.

644 68. Jiao X, Waleign SZ, Nielsen MR, Smith-Hall C. Protected areas, household environmental  
645 incomes and well-being in the Greater Serengeti-Mara Ecosystem. *Forest Policy and Economics*.  
646 2019;106:101948, doi:10.1016/j.forpol.2019.101948.

647 69. Mwenda PK, Olago D, Okatcha F, Ali AA. Vulnerability of Communities to Climate Change  
648 Induced Disaster Risks and Potential Mental Health Outcomes in Isiolo County, Kenya. *Journal of*  
649 *Physical Sciences*. 2022;3(1):37 - 66, doi:10.47941/jps.751.

650 70. Neale C, Boukhechba M, Cinderby S. Understanding psychophysiological responses to  
651 walking in urban settings in Asia and Africa. *Journal of Environmental Psychology*. 2023;86:101973,  
652 doi:10.1016/j.jenvp.2023.101973.

653 71. Straight B, Hilton CE, Naugle A, Olungah CO, Ngo D, Qiao X, Needham BL. Drought,  
654 psychosocial stress, and ecogeographical patterning: Tibial growth and body shape in Samburu  
655 (Kenyan) pastoralist children. *American Journal of Biological Anthropology*. 2022;178(4):574-92,  
656 doi:10.1002/ajpa.24529.

657 72. Egondi T, Kyobutungi C, Kovats S, Muindi K, Ettarh R, Rocklöv J. Time-series analysis of  
658 weather and mortality patterns in Nairobi's informal settlements. *Glob Health Action*. 2012;5:23-32,  
659 doi:10.3402/gha.v5i0.19065.

660 73. Scott AA, Misiani H, Okoth J, Jordan A, Gohlke J, Ouma G, et al. Temperature and heat in  
661 informal settlements in Nairobi. *PLoS One*. 2017;12(11):e0187300,  
662 doi:10.1371/journal.pone.0187300.

663 74. Asefi-Najafabady S, Vandecar, K. L., Seimon, A., Lawrence, P., & Lawrence, D. Climate change,  
664 population, and poverty: Vulnerability and exposure to heat stress in countries bordering the Great  
665 Lakes of Africa. *Climatic Change*. 2018(148):561-73, doi:10.1007/s10584-018-2211-5.

666 75. Bethancourt HJ, Swanson ZS, Nzunza R, Huanca T, Conde E, Kenney WL, et al. Hydration in  
667 relation to water insecurity, heat index, and lactation status in two small-scale populations in hot-  
668 humid and hot-arid environments. *Am J Hum Biol*. 2021;33(1):e23447, doi:10.1002/ajhb.23447.

669 76. Deribe K, Sultani HM, Okoyo C, Omondi WP, Ngere I, Newport MJ, Cano J. Geostatistical  
670 modelling of the distribution, risk and burden of podoconiosis in Kenya. *Trans R Soc Trop Med Hyg*.  
671 2023;117(2):72-82, doi:10.1093/trstmh/trac092.

672 77. United States Agency International Development. Climate Risk in Kenya: Country Risk Profile.  
673 2018. Available from: <https://www.usaid.gov/climate/country-profiles/kenya>.

674 78. UK Meteorological Office. Climate: Observations, projections and impacts: Kenya. 2011.  
675 Available from: [https://www.metoffice.gov.uk/binaries/content/assets/metofficegovuk](https://www.metoffice.gov.uk/binaries/content/assets/metofficegovuk/pdf/research/climate-science/climate-observations-projections-and-impacts/kenya.pdf)  
676 [/pdf/research/climate-science/climate-observations-projections-and-impacts/kenya.pdf](https://www.metoffice.gov.uk/binaries/content/assets/metofficegovuk/pdf/research/climate-science/climate-observations-projections-and-impacts/kenya.pdf).

677 79. Reed SL, McKerrow JH. Why Funding for Neglected Tropical Diseases Should Be a Global  
678 Priority. *Clinical Infectious Diseases*. 2018;67(3):323-6, doi:10.1093/cid/ciy349.

679 80. Chapman N, Doubell A, Oversteegen L, Chowdhary V, Rugarabamu G, Zanetti R, Ong M, Borri  
680 J. Neglected Disease Research and Development: Reflecting on a Decade of Global Investment. *Policy*  
681 *Cures Research*; 2017. Available from: [https://policy-cures-website-](https://policy-cures-website-assets.s3.amazonaws.com/app/uploads/2020/01/09162349/2017-G-FINDER-report.pdf)  
682 [assets.s3.amazonaws.com/app/uploads/2020/01/09162349/2017-G-FINDER-report.pdf](https://policy-cures-website-assets.s3.amazonaws.com/app/uploads/2020/01/09162349/2017-G-FINDER-report.pdf).

683 81. Henry J. Kaiser Family Foundation. The U.S. Government and Global Neglected Tropical  
684 Disease Efforts. 2020. Available from: [https://www.kff.org/global-health-policy/fact-sheet/the-u-s-](https://www.kff.org/global-health-policy/fact-sheet/the-u-s-government-and-global-neglected-tropical-diseases/)  
685 [government-and-global-neglected-tropical-diseases/](https://www.kff.org/global-health-policy/fact-sheet/the-u-s-government-and-global-neglected-tropical-diseases/).

686 82. Kulkarni MA, Duguay C, Ost K. Charting the evidence for climate change impacts on the  
687 global spread of malaria and dengue and adaptive responses: a scoping review of reviews.  
688 *Globalization and Health*. 2022;18(1):1, doi:10.1186/s12992-021-00793-2.

689 83. Allotey P, Reidpath DD, Pokhrel S. Social sciences research in neglected tropical diseases 1:  
690 the ongoing neglect in the neglected tropical diseases. *Health Research Policy and Systems*.  
691 2010;8(1):32, doi:10.1186/1478-4505-8-32.

692 84. Charani E, Abimbola S, Pai M, Adeyi O, Mendelson M, Laxminarayan R, Rasheed MA.  
693 Funders: The missing link in equitable global health research? *PLOS Global Public Health*.  
694 2022;2(6):e0000583, doi:10.1371/journal.pgph.0000583.

695 85. Beran D, Byass P, Gbakima A, Kahn K, Sankoh O, Tollman S, et al. Research capacity building-  
696 obligations for global health partners. *Lancet Glob Health*. 2017;5(6):e567-e8, doi:10.1016/s2214-  
697 109x(17)30180-8.

698 86. O'Neill MS, McMichael AJ, Schwartz J, Wartenberg D. Poverty, environment, and health: the  
699 role of environmental epidemiology and environmental epidemiologists. *Epidemiology*.  
700 2007;18(6):664-8, doi:10.1097/EDE.0b013e3181570ab9.

701 87. Currie DJ, Smith C, Jagals P. The application of system dynamics modelling to environmental  
702 health decision-making and policy - a scoping review. *BMC Public Health*. 2018;18(1):402,  
703 doi:10.1186/s12889-018-5318-8.

704 88. Hwong AR, Wang M, Khan H, Chagwedera DN, Grzenda A, Doty B, et al. Climate change and  
705 mental health research methods, gaps, and priorities: a scoping review. *Lancet Planet Health*.  
706 2022;6(3):e281-e91, doi:10.1016/s2542-5196(22)00012-2.

707 89. Government of the Republic of Kenya. Kenya National Adaptation Plan 2015-2030: Enhanced  
708 climate resilience towards the attainment of Vision 2030 and beyond. In: Ministry of Environment  
709 and Natural Resources, editor. 2016. Available from:  
710 [https://www4.unfccc.int/sites/NAPC/Documents%20NAP/  
711 Kenya\\_NAP\\_Final.pdf](https://www4.unfccc.int/sites/NAPC/Documents%20NAP/Kenya_NAP_Final.pdf).

712 90. Charlson F, Ali S, Benmarhnia T, Pearl M, Massazza A, Augustinavicius J, Scott JG. Climate  
713 Change and Mental Health: A Scoping Review. *Int J Environ Res Public Health*. 2021;18(9),  
714 doi:10.3390/ijerph18094486.

715 91. Bonell AS, Bakary; Badjie, Jainaba; Samateh, Tida; Saidy, Tida; Sosseh, Fatou; Sallah, Yahya;  
716 Bajo, Kebba; Murray, Kris A; Hirst, Jane; Vicedo-Cabrera, Ana; Prentice, Andrew M; Maxwell, Neil S;  
717 Haines, Andy. Environmental heat stress on maternal physiology and fetal blood flow in pregnant  
718 subsistence farmers in The Gambia, west Africa: an observational cohort study. *Lancet planetary  
719 health*. 2022;6(12): e968-e76, doi:10.1016/S2542-5196(22)00242-X.

720 92. McElroy S, Ilango S, Dimitrova A, Gershunov A, Benmarhnia T. Extreme heat, preterm birth,  
721 and stillbirth: A global analysis across 14 lower-middle income countries. *Environment International*.  
722 2022;158:106902, doi:10.1016/j.envint.2021.106902.

723 93. Imbo AE, Mbutia EK, Ngotho DN. Determinants of Neonatal Mortality in Kenya: Evidence  
724 from the Kenya Demographic and Health Survey 2014. *Int J MCH AIDS*. 2021;10(2):287-95,  
725 doi:10.21106/ijma.508.

726 94. United Nations Population Fund. Demographic Dividend: Kenya. The United Nations; 2023.  
727 Available from: <https://www.unfpa.org/data/demographic-dividend/KE>.

728 95. World Health Organization. Climate change and health research: Current trends, gaps and  
729 perspectives for the future. Geneva: World Health Organization (WHO); 2021. Available from:  
730 [https://www.who.int/publications/m/item/climate-change-and-health-research-current-trends-gaps-  
731 and-perspectives-for-the-future](https://www.who.int/publications/m/item/climate-change-and-health-research-current-trends-gaps-and-perspectives-for-the-future).

732 96. Pearse R. Gender and climate change. *WIREs Climate Change*. 2017;8(2):e451,  
733 doi:10.1002/wcc.451.

734 97. Harrington LJ, Dean SM, Awatere S, Rosier S, Queen L, Gibson PB, Barnes C, Zachariah M,  
735 Philip S, Kew S, Koren G, Pinto I, Grieco M, Vahlberg M, Snigh R, Heinrich D, Thalheimer L, Li S, Stone  
736 D, Yang W, Vecchi GA, Frame DJ, Otto FEL. The role of climate change in extreme rainfall associated  
737 with Cyclone Gabrielle over Aotearoa New Zealand's East Coast. *World Weather Attribution Initiative  
738 Scientific Report*. 2023, doi:10.25561/102624.

739 98. O'Hare R. Somalia drought may have caused more than 20,000 child deaths2023. Available  
740 at: <https://www.imperial.ac.uk/news/243879/somalia-drought-have-caused-more-than/>.

741 99. Institute Health Metrics Evaluation. Health research by location – Kenya. 2023. Available  
742 from: <https://www.healthdata.org/research-analysis/health-by-location/profiles/kenya>.

743 100. Schilling J, Werland L. Facing old and new risks in arid environments: The case of pastoral  
744 communities in Northern Kenya. *PLOS Climate*. 2023;2(7):e0000251,  
745 doi:10.1371/journal.pclm.0000251.

746 101. Haider H. Conflict analysis of North Eastern Kenya. Brighton, UK: Institute of Development  
747 Studies; 2020. Available from: <https://opendocs.ids.ac.uk/opendocs/handle/20.500.12413/15570>.  
748



749 **Supporting Information**

| Topic Category                     | Topic Subcategories                                                                                                                        |
|------------------------------------|--------------------------------------------------------------------------------------------------------------------------------------------|
| Climate Change & Seasonality       | Climate change<br>Seasonality<br>Solar radiation                                                                                           |
| Ambient Temperature                | Excess heat<br>Excess cold<br>Temperature variation                                                                                        |
| Rainfall & Humidity                | Rainfall<br>Humidity                                                                                                                       |
| Wind Characteristics               | Wind speed                                                                                                                                 |
| Flooding & Water Characteristics   | Flooding<br>Water level change<br>Water quality parameters                                                                                 |
| Drought                            | Drought<br>Wildfires                                                                                                                       |
| Air Pollution                      | Particulate matter<br>NOx, SO2, Ozone<br>Cooking fuel emissions<br>Lighting emissions<br>Second-hand tobacco smoke<br>Other air pollutants |
| Terrestrial & Water Pollution      | Organic matter contamination<br>Inorganic compound contamination<br>Microbial contamination<br>Plastic pollution                           |
| Topography                         | Soil type & moisture                                                                                                                       |
| Climate Associated Land-use Change | Deforestation<br>Urban development<br>Habitat & vegetation change                                                                          |

750 **S1 Table. Environmental exposure topic categories and their corresponding subcategories**

751

752 **S2 Table. Narrative summaries table**

753 Included study set with summaries of results and information pertinent to this research.

Identification of studies via databases and registers

Identification of studies via other methods

Identification

Records identified from:  
 Medline (n = 3,874)  
 Embase (n = 5,324)  
 Global Health (n = 4,512)  
 FSTA (n = 209)  
 Econlit (n = 82)  
 Africa-Wide Info (n = 2,609)  
 GreenFILE (n = 356)  
 Web of Science (n = 4,639)  
 Scopus (n = 7,838)

Records removed *before screening*:  
 Duplicate records removed:  
 (n = 12,132)

Records identified from:  
 Websites (n = 77)  
 Cited reference search (n = 6)

Screening

Records screened on title and abstract:  
 (n = 17,394)

Records excluded:  
 (n = 16,759)

Reports sought for retrieval:  
 (n = 635)

Reports excluded:  
 No climate exposures (n = 88)  
 Not human health (n = 63)  
 Study type (n = 62)  
 No extractable data (n = 33)  
 Duplicate study (n = 8)  
 Intervention (n = 2)

Reports not retrieved:  
 Conference abstracts (n = 13)  
 Full text not available (n = 13)

Included

Studies included in review:  
 (n = 353)

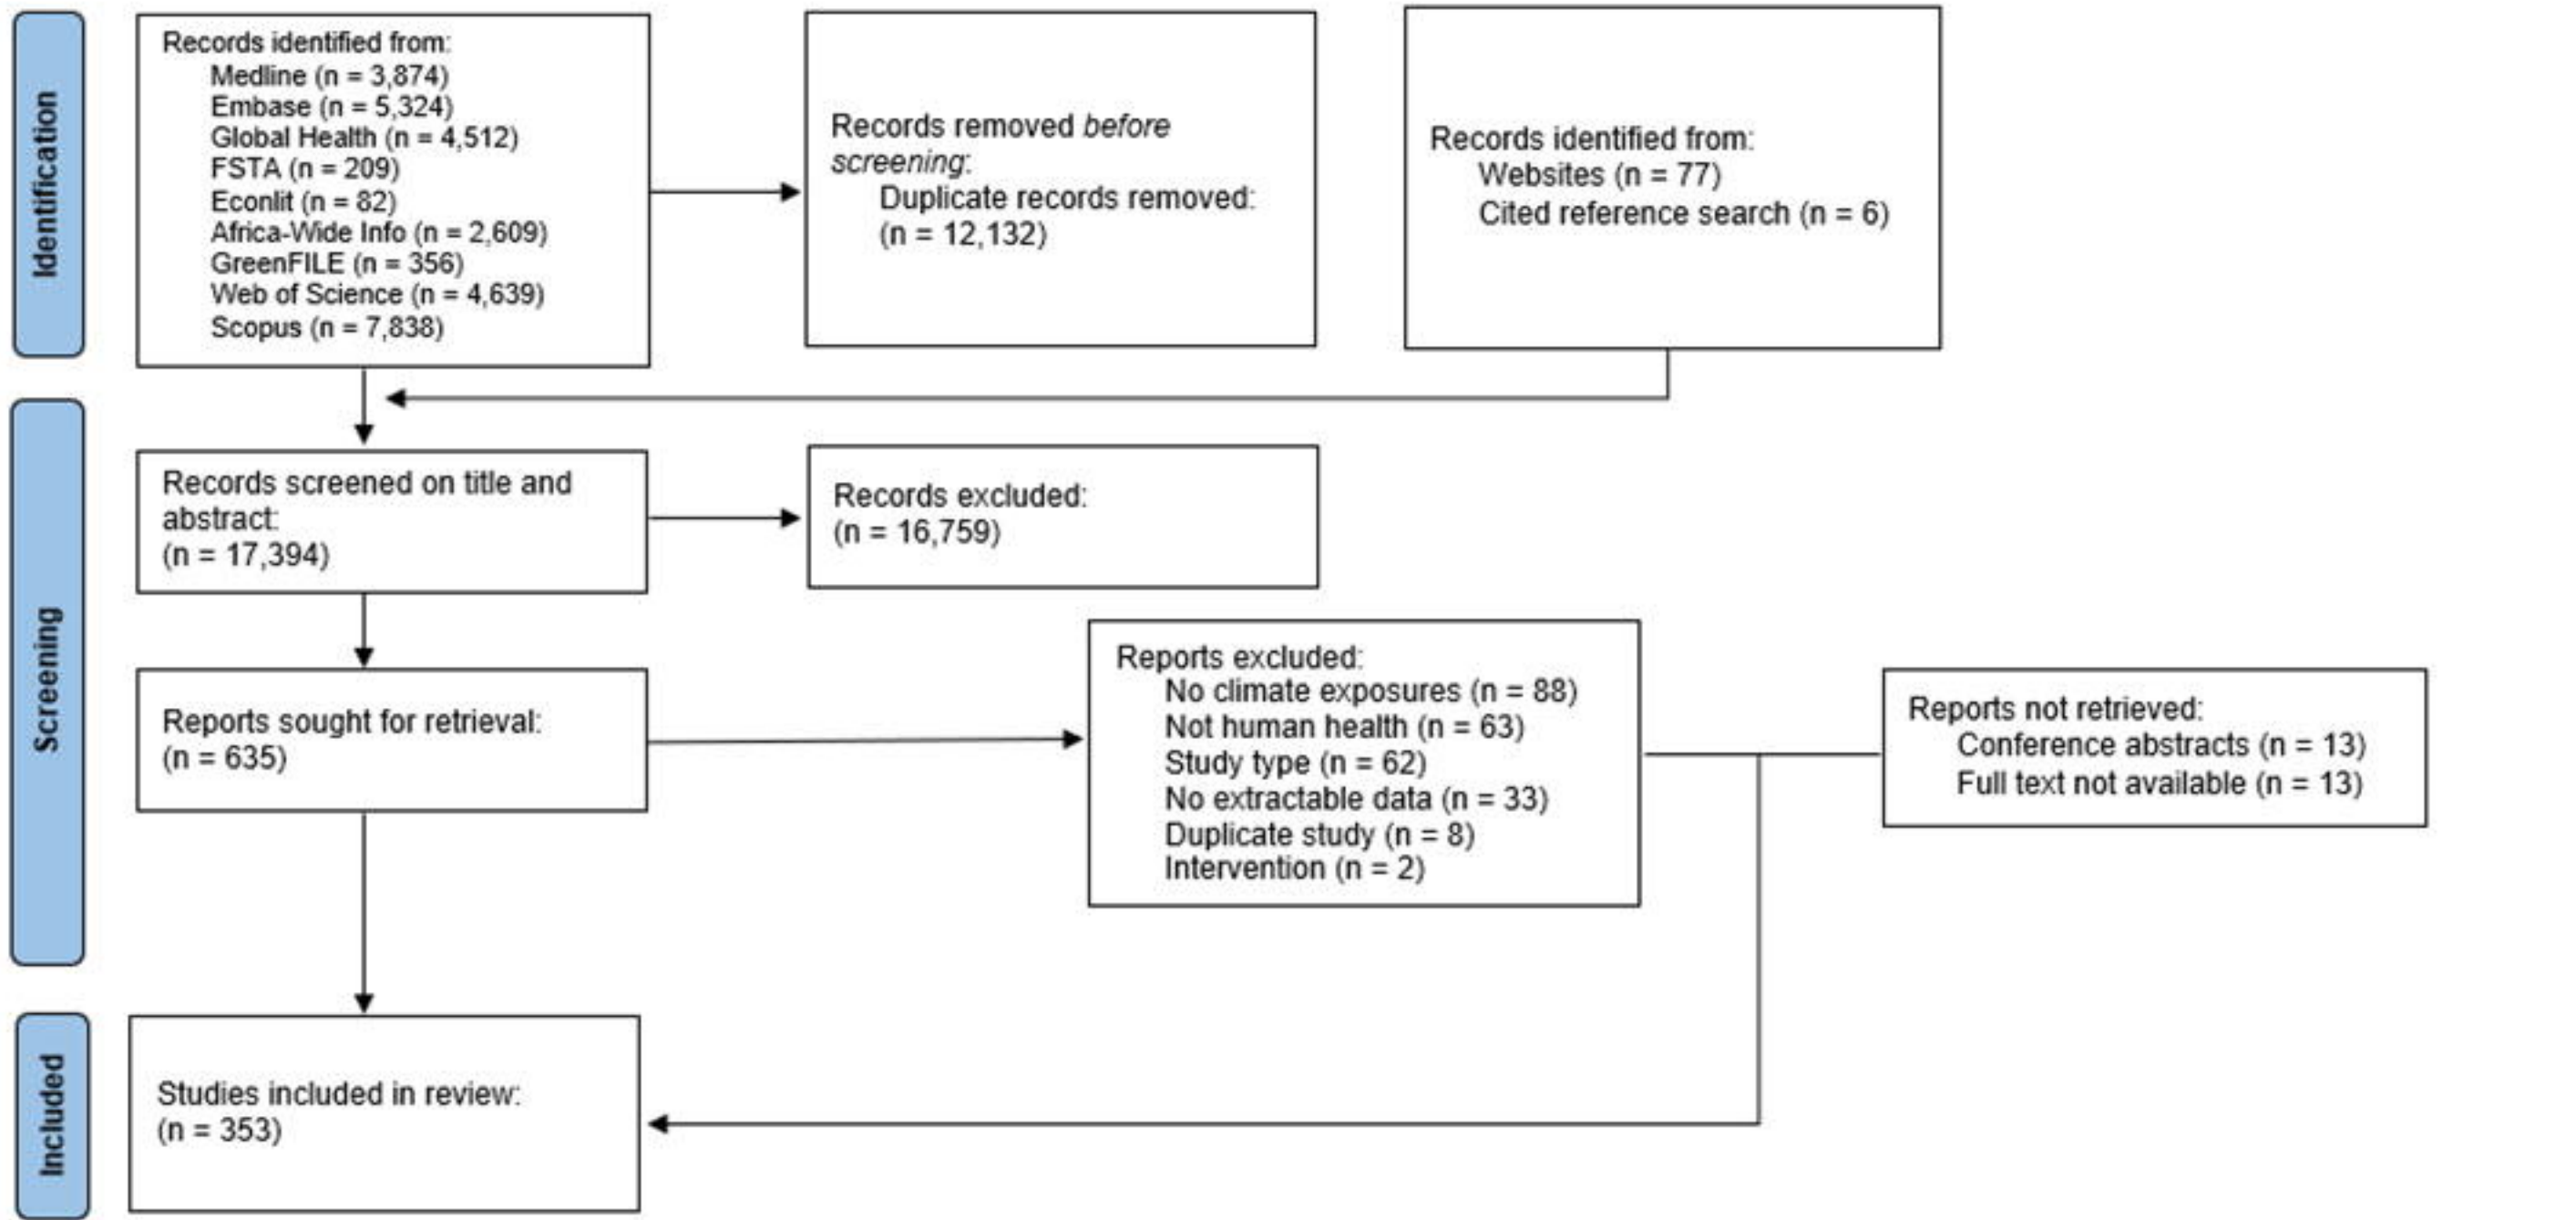



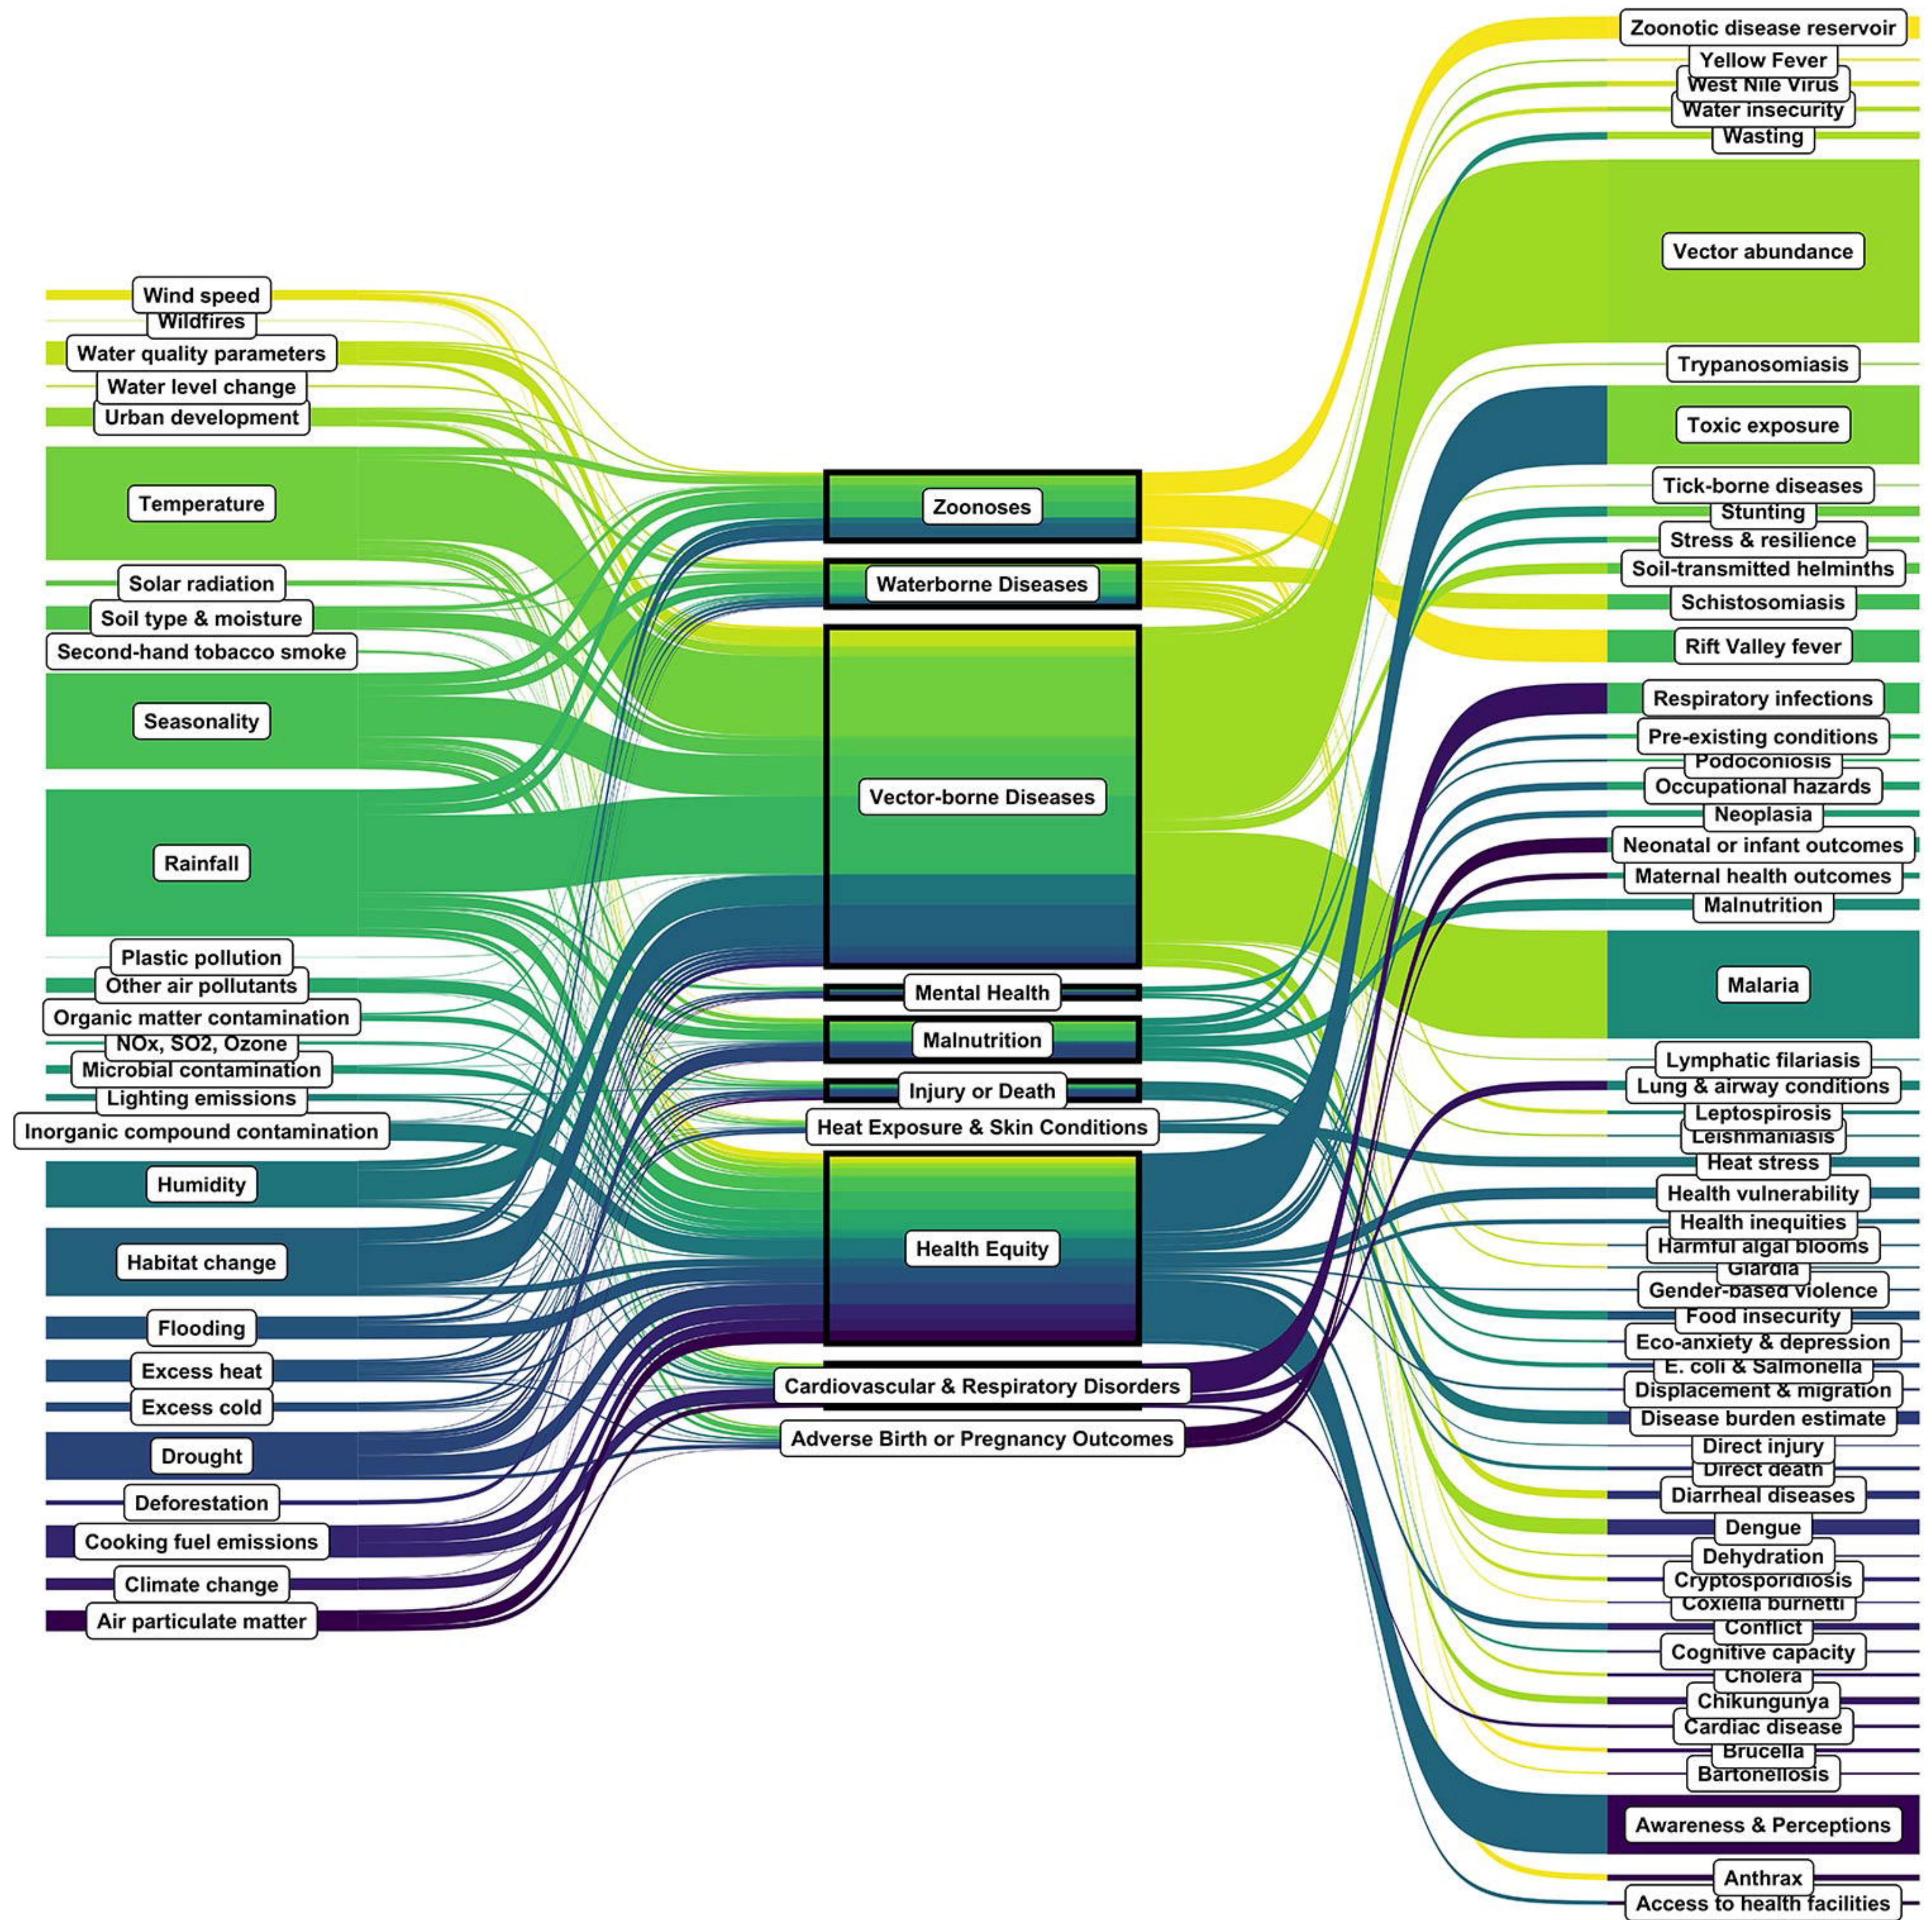

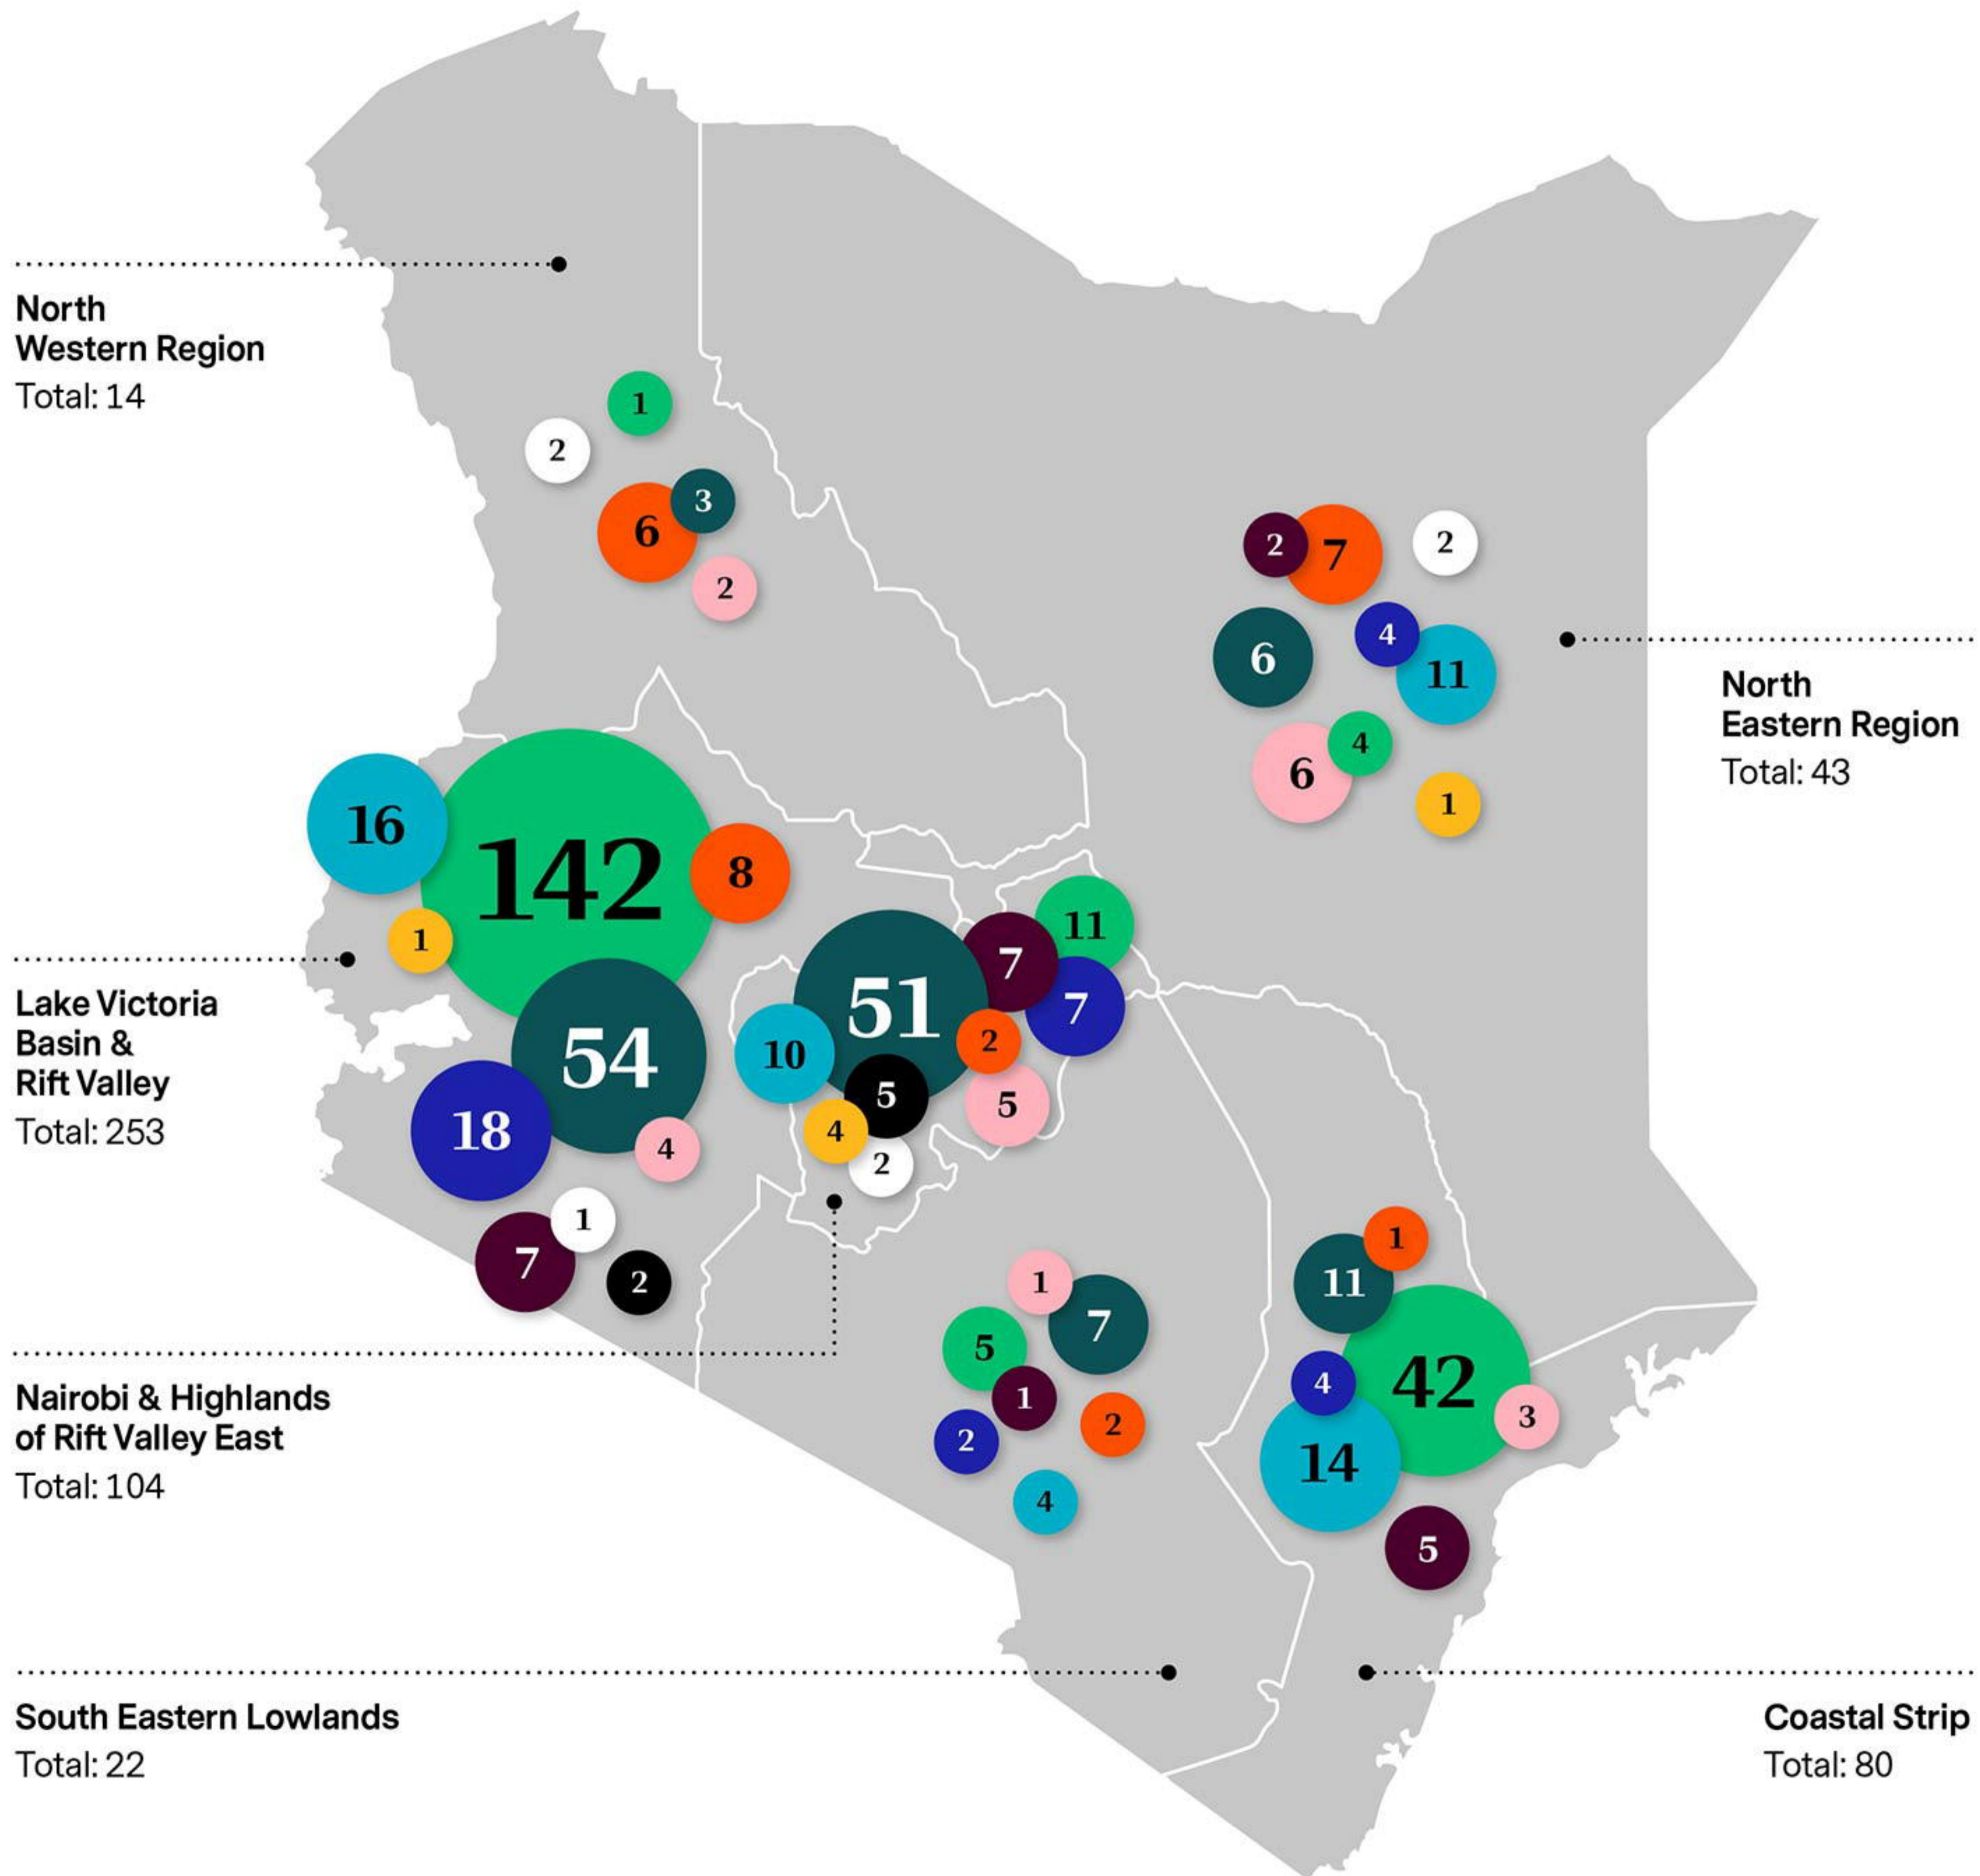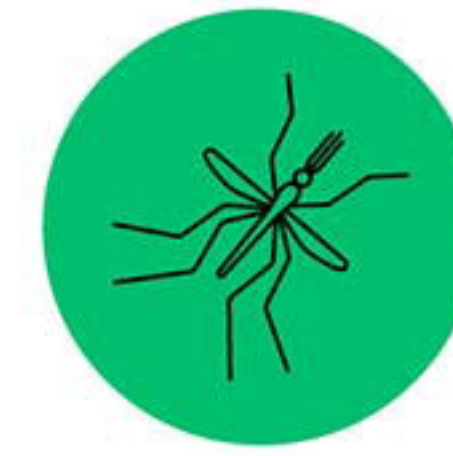

**Vector-borne Diseases**  
Total: 205

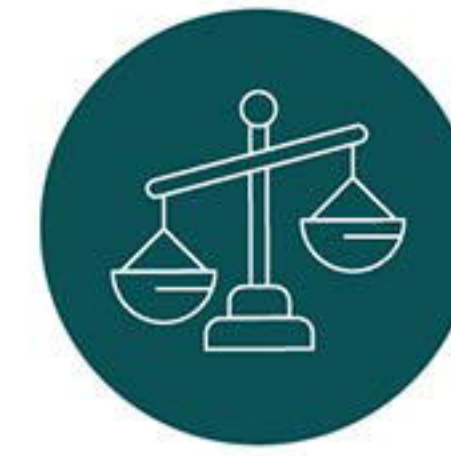

**Health Equity Research**  
Total: 132

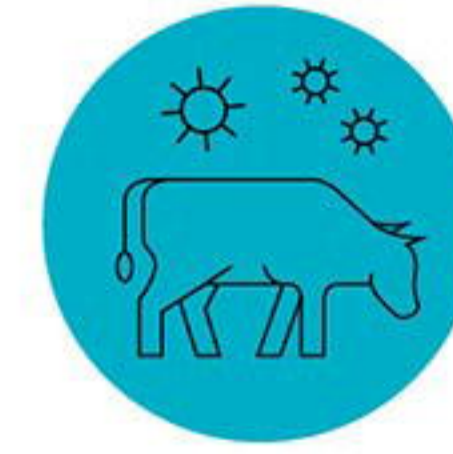

**Zoonoses**  
Total: 55

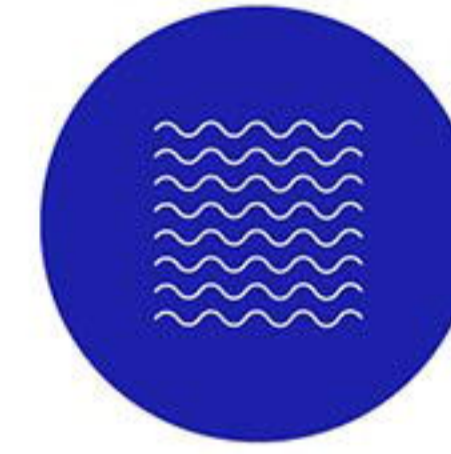

**Waterborne Diseases & Water Access Disorders**  
Total: 35

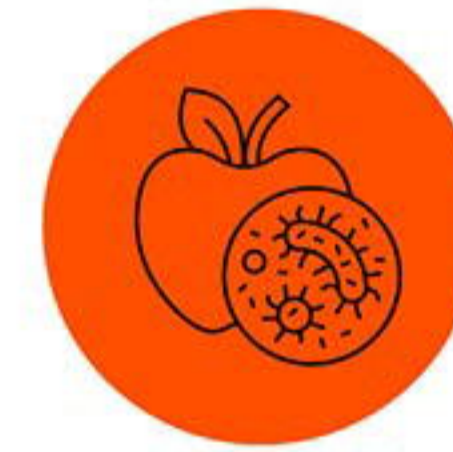

**Malnutrition & Foodborne Diseases**  
Total: 26

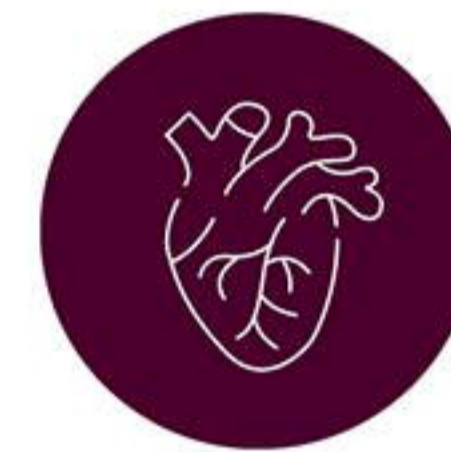

**Cardiovascular, Circulatory & Respiratory Disorders**  
Total: 22

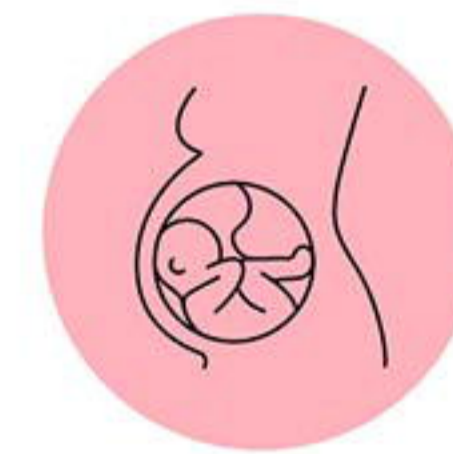

**Adverse Birth or Pregnancy Outcomes**  
Total: 21

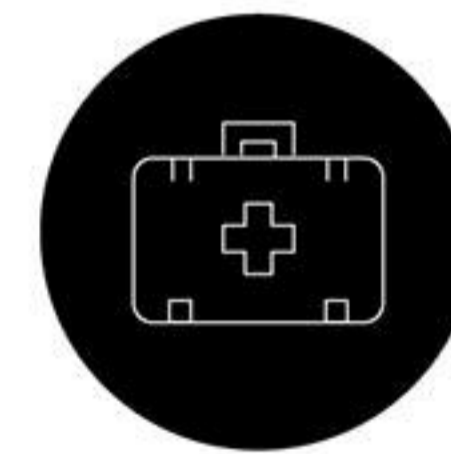

**Injury or Death**  
Total: 7

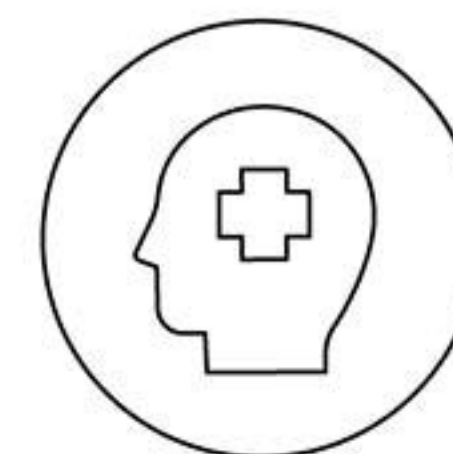

**Mental Health Conditions**  
Total: 7

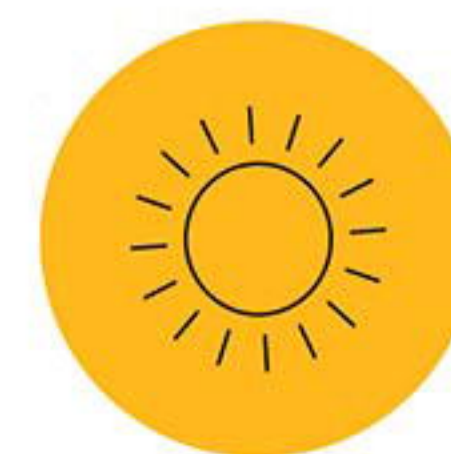

**Heat Exposure**  
Total: 6
